1 **Downregulating PTBP1 fails to convert astrocytes into hippocampal**  
2 **neurons and to alleviate symptoms in Alzheimer’s mouse models**

3

4

5 **Authors**

6 Tiantian Guo<sup>1#</sup>, Xinjia Pan<sup>1#</sup>, Guangtong Jiang<sup>1</sup>, Denghong Zhang<sup>1</sup>, Jinghui Qi<sup>1</sup>,  
7 Lin Shao<sup>1</sup>, Zhanxiang Wang<sup>1</sup>, Huaxi Xu<sup>1,2\*</sup>, Yingjun Zhao<sup>1\*</sup>

8

9 **Affiliations**

10 <sup>1</sup>Center for Brain Sciences, the First Affiliated Hospital of Xiamen University,  
11 Institute of Neuroscience, Fujian Provincial Key Laboratory of  
12 Neurodegenerative Disease and Aging Research, School of medicine, Xiamen  
13 University, Xiamen, China.

14 <sup>2</sup>Institute for Brain Science and Disease, Chongqing Medical University,  
15 Chongqing, China.

16 #These authors contributed equally.

17 \*Correspondence:

18 [Huaxi.Xu@MolecularNeurodegeneration.org](mailto:Huaxi.Xu@MolecularNeurodegeneration.org);

19 [yjzhao@xmu.edu.cn](mailto:yjzhao@xmu.edu.cn)

20

21

22

23

24

25

26

27

28

29

30

31 **Abstract**

32 Conversion of astroglia into functional neurons has been considered as a  
33 promising therapeutic strategy for neurodegenerative diseases. Recent studies  
34 reported that downregulation of the RNA binding protein, PTBP1, converts  
35 astrocytes into neurons in situ in multiple mouse brain regions, consequently  
36 improving pathological phenotypes associated with Parkinson's disease, RGC  
37 loss, and aging. Here, we demonstrate that PTBP1 downregulation using  
38 antisense oligonucleotides or an astrocyte specific AAV-mediated shRNA  
39 system fails to convert hippocampal astrocytes into neurons in WT, and  $\beta$ -  
40 amyloid (5 $\times$ FAD) and tau (PS19) Alzheimer's disease (AD) mouse models, and  
41 fails to reverse synaptic/cognitive deficits and AD-associated pathology.  
42 Similarly, PTBP1 downregulation cannot convert astrocytes into neurons in the  
43 striatum and substantia nigra. Together, our study suggests that cell fate  
44 conversion strategy for neurodegenerative disease therapy through  
45 manipulating one single gene, such as PTBP1, warrants more rigorous scrutiny.

46

47

48

## 49 **Introduction**

50 Neuronal loss is the primary cause for functional deterioration in the central  
51 nervous system (CNS) in neurodegenerative diseases such as Parkinson's  
52 disease (PD) and Alzheimer's disease (AD) (Kalia & Lang, 2015; Mesulam,  
53 1999). Replenishment of neurons is considered as an effective approach to  
54 restore CNS function. Two major regeneration strategies utilizing neuronal  
55 lineage cells have been developed so far: transplantation of exogenous iPSC-  
56 derived neuronal cells and activation of endogenous neurogenesis niche.  
57 However, transplantation of exogenous cells may induce immunological  
58 rejection and tumorigenesis (Olanow et al., 2003; Trounson & McDonald, 2015).  
59 Adult neurogenesis only occurs in a few small brain regions in rodent models,  
60 and whether it exists in humans remains controversial (Gage, 2019;  
61 Kempermann et al., 2018). In pursuing novel approaches for neuronal  
62 replenishment, attempts have been made to transdifferentiate residential glia  
63 cells into functional neurons (Chen et al., 2020; Grande et al., 2013; Guo et al.,  
64 2014; Lentini et al., 2021; Liu et al., 2015; Maimon et al., 2021; Matsuda et al.,  
65 2019; Mattugini et al., 2019; Niu et al., 2015; Qian et al., 2020; Tai et al., 2021;  
66 Torper et al., 2015; Zhou et al., 2020). The *in situ* glia-to-neuron conversion  
67 represents an ideal strategy for neuronal regeneration, because: (1) glial cells  
68 including astrocytes and microglia are over-proliferated and become reactive  
69 (this process was termed as gliosis), leading to neuroinflammation during  
70 neurodegeneration; (2) neurons can be regenerated from the excessive glia in  
71 designated brain regions where neuronal loss occurs.

72 Among the targets for converting astroglia into neurons, polypyrimidine tract-  
73 binding protein 1 (PTBP1) has attracted much attention, because  
74 downregulation of this single protein has been indicated to be sufficient to  
75 directly convert astrocytes into functional neurons with high efficiencies, within  
76 several weeks to months (Maimon et al., 2021; Qian et al., 2020; Zhou et al.,  
77 2020). Specifically, downregulation of PTBP1 by AAV-mediated shRNA system

78 or antisense oligonucleotides (ASO) converted midbrain astrocytes to  
79 dopaminergic neurons, and reversed motor deficits in a chemically induced PD  
80 mouse model (Qian et al., 2020). Similar motor function improvement was  
81 observed in the PD mice when striatal astrocytes were converted into functional  
82 neurons by CRISPR-CasRx-mediated PTBP1 downregulation (Zhou et al.,  
83 2020). In addition, injection of ASO targeting *Ptbp1* into cerebral spinal fluid  
84 (CSF) generated new functional cortical or hippocampal neurons in both young  
85 and aged mice (Maimon et al., 2021). Those results, should they sustain, would  
86 represent revolutionary advancement in therapeutics for neurodegenerative  
87 diseases.

88 In the current study, utilizing ASO and an astrocyte-restrictive AAV shRNA  
89 system, we examine whether the reported astrocyte-to-neuron conversion  
90 induced by PTBP1 downregulation can happen in the hippocampus and  
91 consequently rescue synaptic and cognitive impairments in AD-associated  
92 mouse models, namely amyloid and tau (neurofibrillary tangle) models, 5×FAD  
93 and PS19, respectively. In addition, we re-examine whether PTPB1  
94 knockdown can efficiently convert astrocytes into neurons in the brain regions  
95 of substantia nigra and striatum, as previously reported.

96

## 97 **Results**

### 98 **Downregulation of PTBP1 by ASO fails to promote the generation of** 99 **neurons in mouse hippocampus**

100 Because there is a great potential for ASO in clinical applications (Leavitt &  
101 Tabrizi, 2020; Miller et al., 2020; Miller et al., 2013), we first tested the effect of  
102 *Ptbp1* ASO (with the same nucleotide sequence as reported in (Qian et al.,  
103 2020) on neuronal generation. Two weeks after mouse hippocampal injection  
104 of a FAM-labeled ASO targeting *Ptbp1* (*Ptbp1*-ASO), we observed FAM signals  
105 in mostly NeuN<sup>+</sup> and to a much lesser extent GFAP<sup>+</sup> cells near the injection site

106 **(Figure 1—figure supplement 1A)**, indicating the lack of astrocytic specificity  
107 for ASO delivery. *Ptbp1*-ASO injection resulted in a significant reduction, but  
108 incomplete elimination of PTBP1 immunofluorescent (IF) intensities in GFAP<sup>+</sup>  
109 cells **(Figure 1—figure supplement 1, B and C)**; however, the number of cells  
110 labeled with doublecortin X (DCX), a marker for neural progenitor cells and  
111 immature neurons, and the area labeled by mature neuronal marker NeuN are  
112 indistinguishable between the *Ptbp1*-ASO and the control groups **(Figure 1—**  
113 **figure supplement 1, D to F)**. These data suggest that downregulation of  
114 PTBP1 by ASO cannot promote the generation of both immature and mature  
115 neurons.

#### 116 **Knockdown of PTBP1 by an astrocyte-restrictive AAV shRNA fails to** 117 **convert hippocampal astrocytes into neurons *in vivo***

118 AAV driven by specific promoters has been widely used to efficiently deliver  
119 genes or DNA fragments including shRNAs into particular types of CNS cells.  
120 We constructed an *hGFAP* promoter-driven AAV vector, which comprises a  
121 mCherry reporter and a *Ptbp1*-targeting shRNA in a miR30 cassette **(Figure**  
122 **1A)**. A modified longer form of *hGFAP* promoter was used to ensure the  
123 specificity of astrocytic expression, as many serotypes of the AAV driven by the  
124 short form *hGFAP* promoter have been reported to having leaky expression in  
125 non-astrocytic cells (Wang et al., 2021). The knockdown efficiency of three AAV  
126 shRNA viruses was compared with the control AAV scramble virus in primary  
127 astrocytic cultures. Because of the highest knockdown efficiency of AAV-GFAP-  
128 sh*Ptbp1*-1 **(Figure 1, B and C)** (nucleotide sequence of the shRNA is identical  
129 to that used in (Qian et al., 2020)), it was chosen and designated as AAV-  
130 sh*Ptbp1* or sh*Ptbp1* for all subsequent experiments.

131 We next transduced AAV-sh*Ptbp1* unilaterally into the right hippocampal  
132 dentate gyrus, and AAV-scramble control in the left dentate gyrus, of adult WT  
133 mice **(Figure 1D)**. Two weeks after the transduction, both sides showed

134 restricted mCherry expression in GFAP<sup>+</sup> astrocytes in the dentate gyrus and  
135 the nearby areas (**Figure 1, E to G**). IF staining for PTBP1 showed that AAV-  
136 sh*Ptbp1* achieved nearly complete depletion of PTBP1 in mCherry<sup>+</sup> cells, and  
137 consequently dramatic reduction in the number of PTBP1<sup>+</sup>mCherry<sup>+</sup> cells, when  
138 compared to the control side (**Figure 1, H and I**). These results demonstrate  
139 that AAV-sh*Ptbp1* can rapidly, efficiently, and specifically knockdown PTBP1 in  
140 the hippocampal astrocytes *in vivo*. Nevertheless, AAV-sh*Ptbp1* yielded only  
141 handful and neglectable numbers of NeuN<sup>+</sup>mCherry<sup>+</sup> cells, which are similar to  
142 AAV-scramble control (**Figure 1, J and K**). DCX<sup>+</sup>mCherry<sup>+</sup> cells were  
143 undetectable, whereas the numbers of DCX<sup>+</sup> cells were comparable in the  
144 knockdown and control groups (**Figure 1, J, L and M**). Our data clearly show  
145 that suppression of PTBP1 expression cannot convert astrocytes into either  
146 immature or mature neurons.

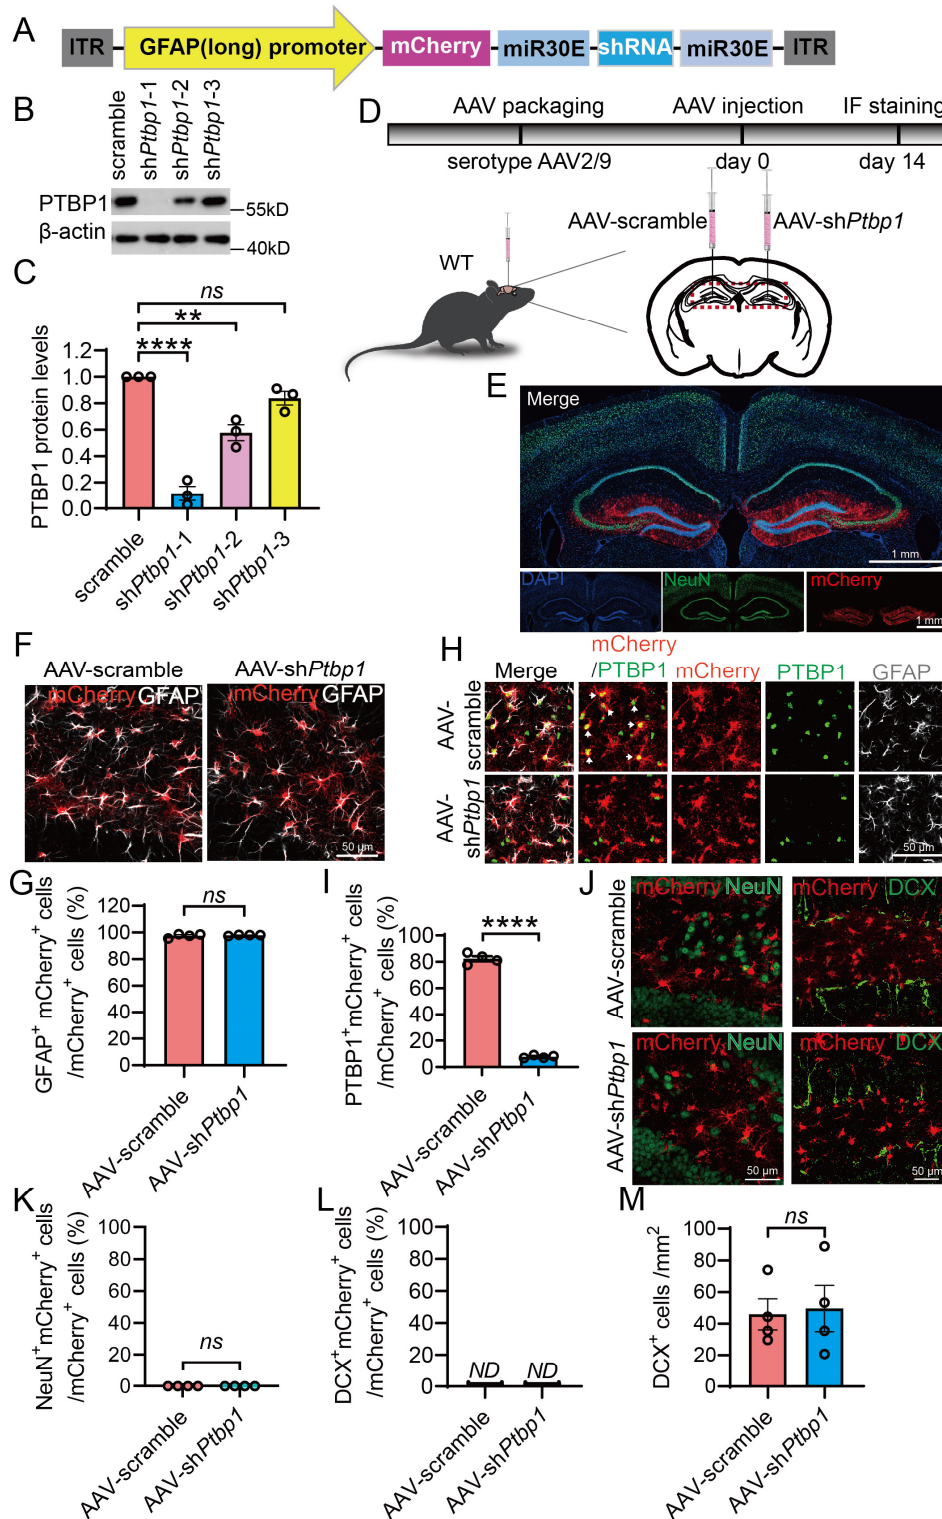

147

148 **Figure 1. Specific knockdown of PTBP1 in astrocytes fails to convert**  
 149 **hippocampal astrocytes into neurons in WT mice**

150 **(A)** Schematic of the AAV-shRNA vector used in this study. **(B and C)** Western  
 151 blot analysis of PTBP1 expression in mouse primary astrocytes 7 days post

152 AAV transduction. (B) Representative PTBP1 blots, (C) quantification.  $n = 3$   
153 independent experiments, one-way ANOVA with Tukey's multiple  
154 comparisons. (D) Flow chart of study design to assess PTBP1  
155 downregulation in mouse hippocampus. (E) Confocal images of the mouse  
156 hippocampus and cortex 2 weeks after the AAV injection. (F and G) Confocal  
157 analysis of mCherry expression in GFAP<sup>+</sup> cells. (F) Representative images,  
158 (G) quantification.  $n = 4$  animals, unpaired t-test. (H and I) Confocal analysis  
159 of PTBP1 expression in mCherry<sup>+</sup> cells. (H) Representative images, (I)  
160 quantification.  $n = 4$  animals, unpaired t-test. (J to M) Confocal analysis of  
161 fluorescent cells. (J) Representative images, (K-M) quantification.  $n = 4$   
162 animals, unpaired t-test. All quantified data are represented as mean  $\pm$  SEM;  
163 \*\* $p < 0.01$ ; \*\*\*\* $p < 0.0001$ ; *ns*, not significant; *ND*, undetectable. Figure 1—  
164 source data 1 to 7, source data for Figure 1B, 1C, 1G, 1I, 1K, 1L, 1M.

165

## 166 **Sustained downregulation of PTBP1 fails to convert hippocampal** 167 **astrocytes into neurons in an amyloid AD mouse model**

168 Next, we investigated whether a long-term and continuous PTBP1  
169 downregulation can enhance neuronal generation in 5×FAD mice, a widely  
170 used AD mouse model with progressive amyloid- $\beta$  (A $\beta$ ) pathology, synaptic and  
171 cognitive impairments (Guo et al., 2020). The long-term knockdown of PTBP1  
172 strategy was based on the fact that the astrocyte-to-neuron conversion as well  
173 as the pathogenesis of most neurodegenerative diseases such as AD and PD  
174 are progressive and chronic. We injected AAV-sh*Ptbp1* or AAV-scramble  
175 bilaterally into the hippocampus of 5×FAD and WT control mice at ~5.5 months  
176 of age, and performed IF analyzes at 1 and up to 3 months after the  
177 transduction. AAV-sh*Ptbp1* markedly reduced the expression of PTBP1 in  
178 mCherry<sup>+</sup> cells, when compared to the AAV-scramble group (**Figure 2, A and**  
179 **B, and Figure 2—figure supplement 1, A and B**). However, only a neglectable



180 fraction of NeuN<sup>+</sup>mCherry<sup>+</sup> cells were observed, whereas the vast majority of  
181 mCherry<sup>+</sup> cells are GFAP<sup>+</sup> astrocytes (**Figure 2, C** to **E**, and **Figure 2—figure**  
182 **supplement 1, C** to **E**). In addition, NeuN<sup>+</sup> areas did not vary between AAV-  
183 sh*Ptbp1* and AAV-scramble groups (**Figure 2, C** and **F**, and **Figure 2—figure**  
184 **supplement 1, C** and **F**). Further, AAV-sh*Ptbp1* failed to reverse the over-  
185 proliferation of GFAP<sup>+</sup> astrocytes and the reduction of DCX<sup>+</sup> cells in 5×FAD  
186 mice (**Figure 2, C** and **G** to **I**, and **Figure 2—figure supplement 1, C** and **G** to  
187 **I**), two phenomena that have been reported (Demars et al., 2010; Perez-Nievas  
188 & Serrano-Pozo, 2018; Zaletel et al., 2018). DCX<sup>+</sup>mCherry<sup>+</sup> cells were  
189 completely undetectable in all groups (**Figure 2, H** and **J** and **Figure 2—figure**  
190 **supplement 1, H** and **J**). Together, these results demonstrate that sustained  
191 downregulation of PTBP1 in the hippocampus also fails to convert astrocytes  
192 into neurons in 5×FAD mice.

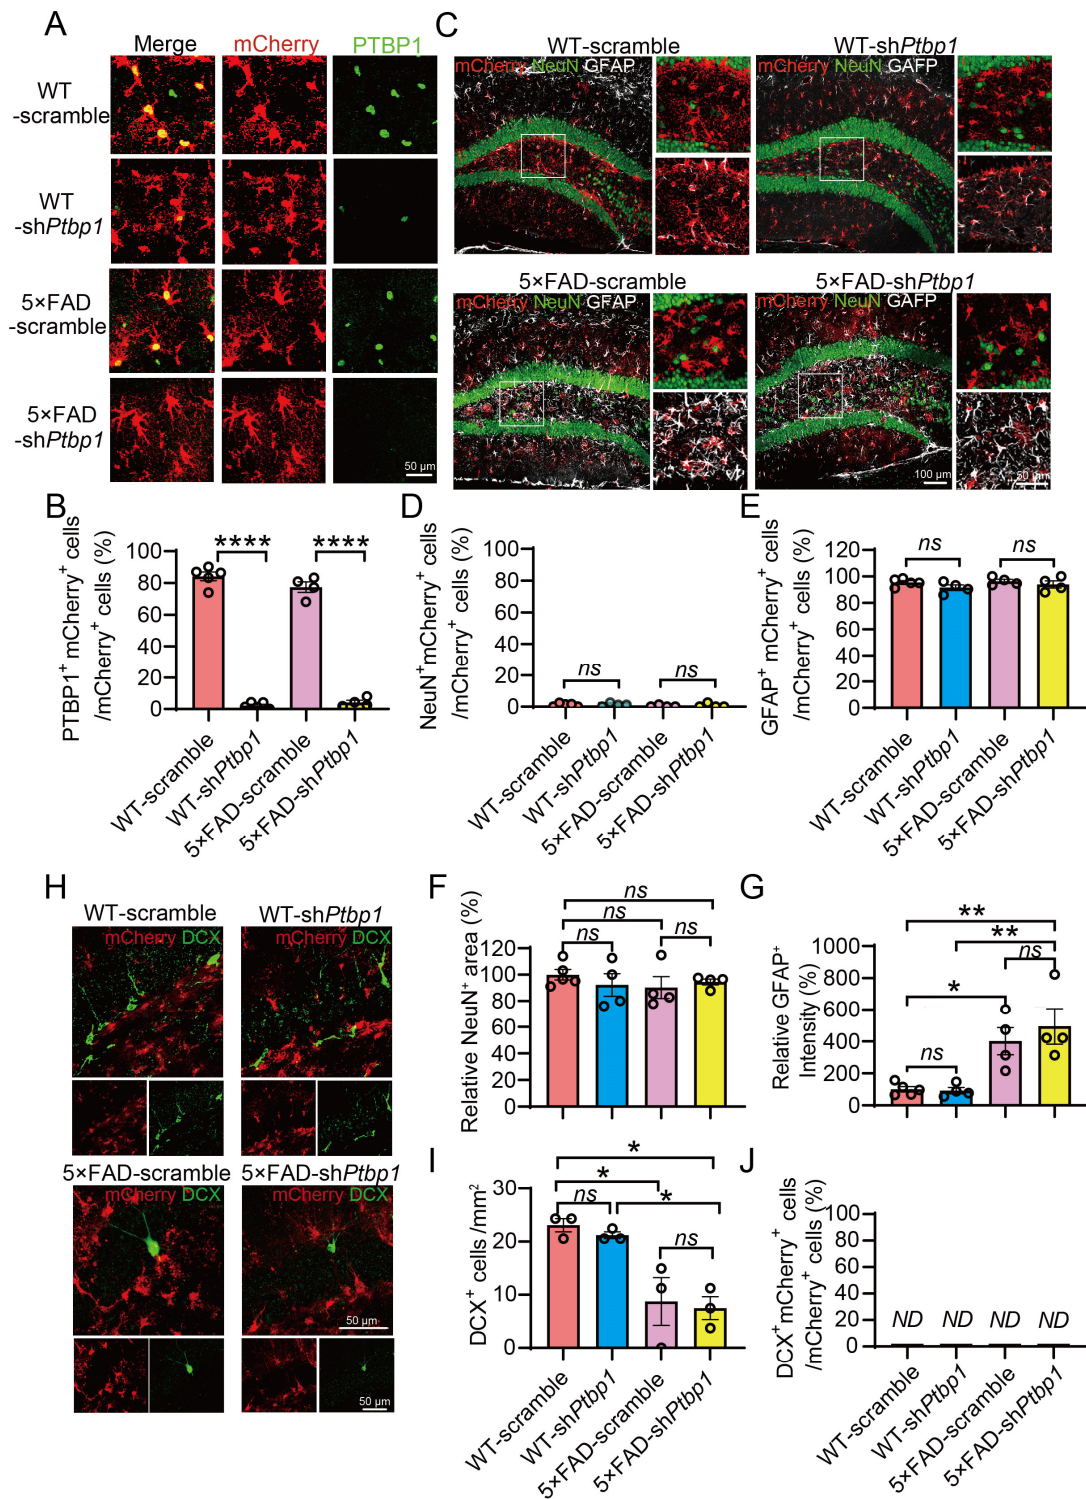

193

194 **Figure 2. Downregulation of PTBP1 is not able to convert astrocytes into**  
 195 **neurons in the hippocampus of 5x FAD mice**

196 (A and B) Confocal analysis of PTBP1 expression in mCherry<sup>+</sup> cells in the  
 197 hippocampus of 5x FAD and WT control mice 3 months after shPtbp1 or the

198 scramble control AAV transduction. (A) Representative images, (B)  
199 quantification. n = 4 to 5 animals, unpaired t-test. (C to G) Confocal analysis of  
200 fluorescent cells. (C) Representative images, (D-G) quantification. n = 4 to 5  
201 animals, one-way ANOVA with Tukey's multiple comparisons. (H to J) Confocal  
202 analysis of mCherry<sup>+</sup> cells and DCX<sup>+</sup> cells. (H) Representative images (I and J)  
203 quantification. n = 3 animals per group, one-way ANOVA with Tukey's multiple  
204 comparisons. All quantified data are represented as mean ± SEM; \*p <0.05; \*\*p  
205 <0.01; \*\*\*\*p <0.0001; ns, not significant; ND, undetectable. Figure 2—source  
206 data 1 to 7, source data for Figure 2B, 2D, 2E, 2F, 2G, 2I, 2J.

207

### 208 **PTBP1 downregulation cannot alleviate A $\beta$ -associated synaptic and** 209 **cognitive deficits and pathologies in AD mice**

210 The ultimate goal for neuronal regeneration is to restore brain functions which  
211 are impaired in neurodegeneration. We performed behavioral tests to evaluate  
212 cognitive functions of the mice after AAV-mediated PTBP1 knockdown. In the  
213 Morris water maze test, AAV-sh*Ptbp1* failed to alleviate the deficits of spatial  
214 memory in 5 $\times$ FAD mice in the training and probe test phases (**Figure 3, A and**  
215 **B**). Similarly, the novel object recognition (NOR) test showed that comparing to  
216 the WT control mice, 5 $\times$ FAD mice spent less time on the novel object, and AAV-  
217 sh*Ptbp1* was unable to reverse this deficit (**Figure 3C**). As expected, AAV-  
218 sh*Ptbp1* also failed to rescue impairments in long-term potentiation (LTP) and  
219 synaptophysin (SYP) /PSD95 labeled synaptic clusters in 5 $\times$ FAD mice (**Figure**  
220 **3, D to G**). Additionally, amyloid deposition in the hippocampus of 5 $\times$ FAD mice  
221 was not altered after PTBP1 downregulation (**Figure 3, H and I**). Taken together,  
222 PTBP1 downregulation can neither restore synaptic and cognitive function, nor  
223 reduce amyloid pathology in 5 $\times$ FAD mice.

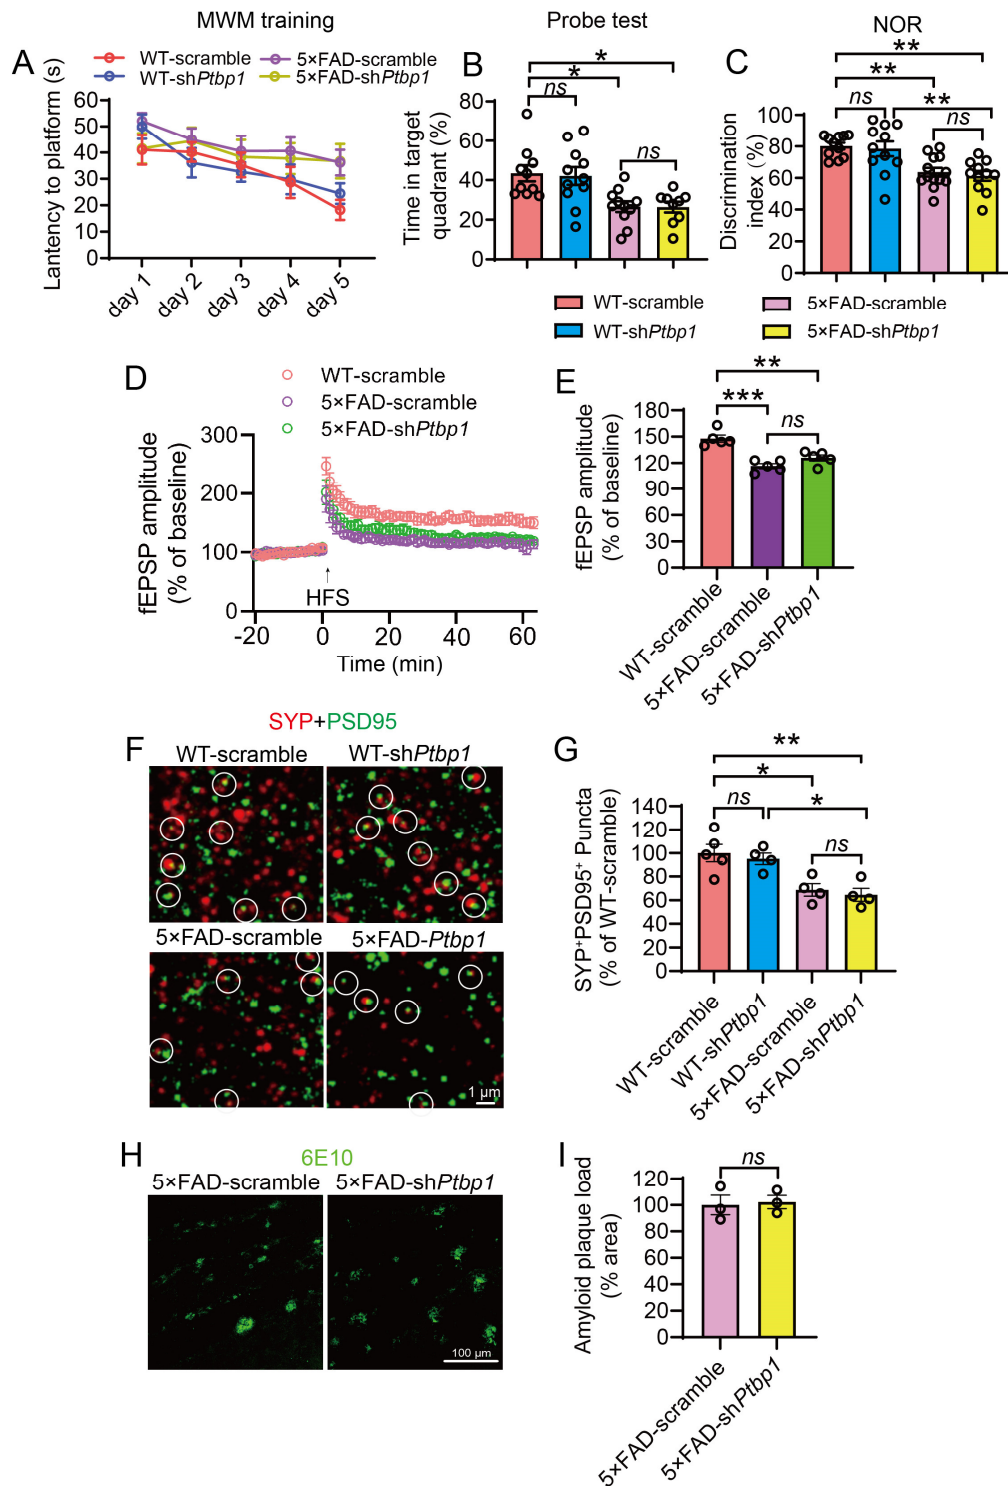

224

225 **Figure 3. Downregulation of PTBP1 in the hippocampus fails to attenuate**

226 **cognitive and synaptic deficits as well as Aβ deposition in 5x FAD mice**

227 (A and B) MWM analysis of 5x FAD and WT control mice 2.5 months after

228 sh*Ptbp1* or the scramble control AAV transduction. (A) The Latency to find the

229 hidden platform during the training phase, (B) time spent in the target quadrant  
230 in the probe test. n = 9 to 11 animals, one-way ANOVA with Tukey's multiple  
231 comparisons. (C) Quantification of discrimination indexes in the NOR test of the  
232 experimental mouse. n = 11 to 13 animals, one-way ANOVA with Tukey's  
233 multiple comparisons. (D and E) Electrophysiological analysis of LTP. (D)  
234 Recordings of hippocampal LTP induced by high-frequency stimulation (HFS),  
235 (E) quantification of the field excitatory post synaptic potentials (fEPSP) during  
236 the last 10 min of LTP recording. n = 5 brain slices from 4 animals per group,  
237 one-way ANOVA with Tukey's multiple comparisons. (F and G) Confocal  
238 analysis of SYP+PSD95<sup>+</sup> synaptic puncta. (F) Representative images, (G)  
239 quantification. n = 4 to 5 animals, one-way ANOVA with Tukey's multiple  
240 comparisons. (H and I) Confocal analysis of 6E10 (A $\beta$  antibody) stained  
241 amyloid deposits. (H) Representative images, (I) quantification. n = 3 animals  
242 per group, unpaired t-test. All quantified data are represented as mean  $\pm$  SEM;  
243 \*p <0.05; \*\*p <0.01; \*\*\*p <0.001 ns, not significant. Figure 3—source data 1 to  
244 7, source data for Figure 3A, 3B, 3C, 3D, 3E, 3G, 3I.

245

## 246 **Knockdown of PTBP1 fails to induce the hippocampal astrocyte-to-** 247 **neuron conversion and to improve cognitive function in tau transgenic** 248 **mice**

249 Tau pathology has been linked to the degree of dementia and considered to  
250 play a causal role in neuronal loss in tauopathies including AD (Fu et al., 2017;  
251 Guo et al., 2020). We therefore assessed the PTPB1 knockdown strategy in  
252 tau transgenic PS19 mice that develop neuronal loss and brain atrophy starting  
253 from 9 month (Yoshiyama et al., 2007). AAV-sh*Ptbp1* or AAV-scramble viruses  
254 were injected bilaterally into the hippocampus of 8-month-old PS19 and WT  
255 mice. Similar to the 5 $\times$ FAD mice tested above, the expression of PTBP1 was  
256 dramatically reduced in mCherry<sup>+</sup> cells 3 months post AAV-sh*Ptbp1*

257 transduction (**Figure 4, A and B**). mCherry fluorescent signals were detected  
258 mostly in GFAP<sup>+</sup> astrocytes, sparsely in NeuN<sup>+</sup> neurons, and were undetectable  
259 in DCX<sup>+</sup> cells, in both AAV-sh*Ptbp1* and AAV-scramble groups (**Figure 4, C to**  
260 **E, H and I**). Consistent with the previous reports (Yoshiyama et al., 2007), we  
261 expectedly observed the apparent loss of NeuN<sup>+</sup> mature neurons and DCX<sup>+</sup>  
262 neuronal progenitors, as well as increased GFAP<sup>+</sup> astrocytes in PS19 mice, all  
263 of which, however, remained completely unaffected following the efficient  
264 PTBP1 downregulation (**Figure 4, C, F, G, H and J**).

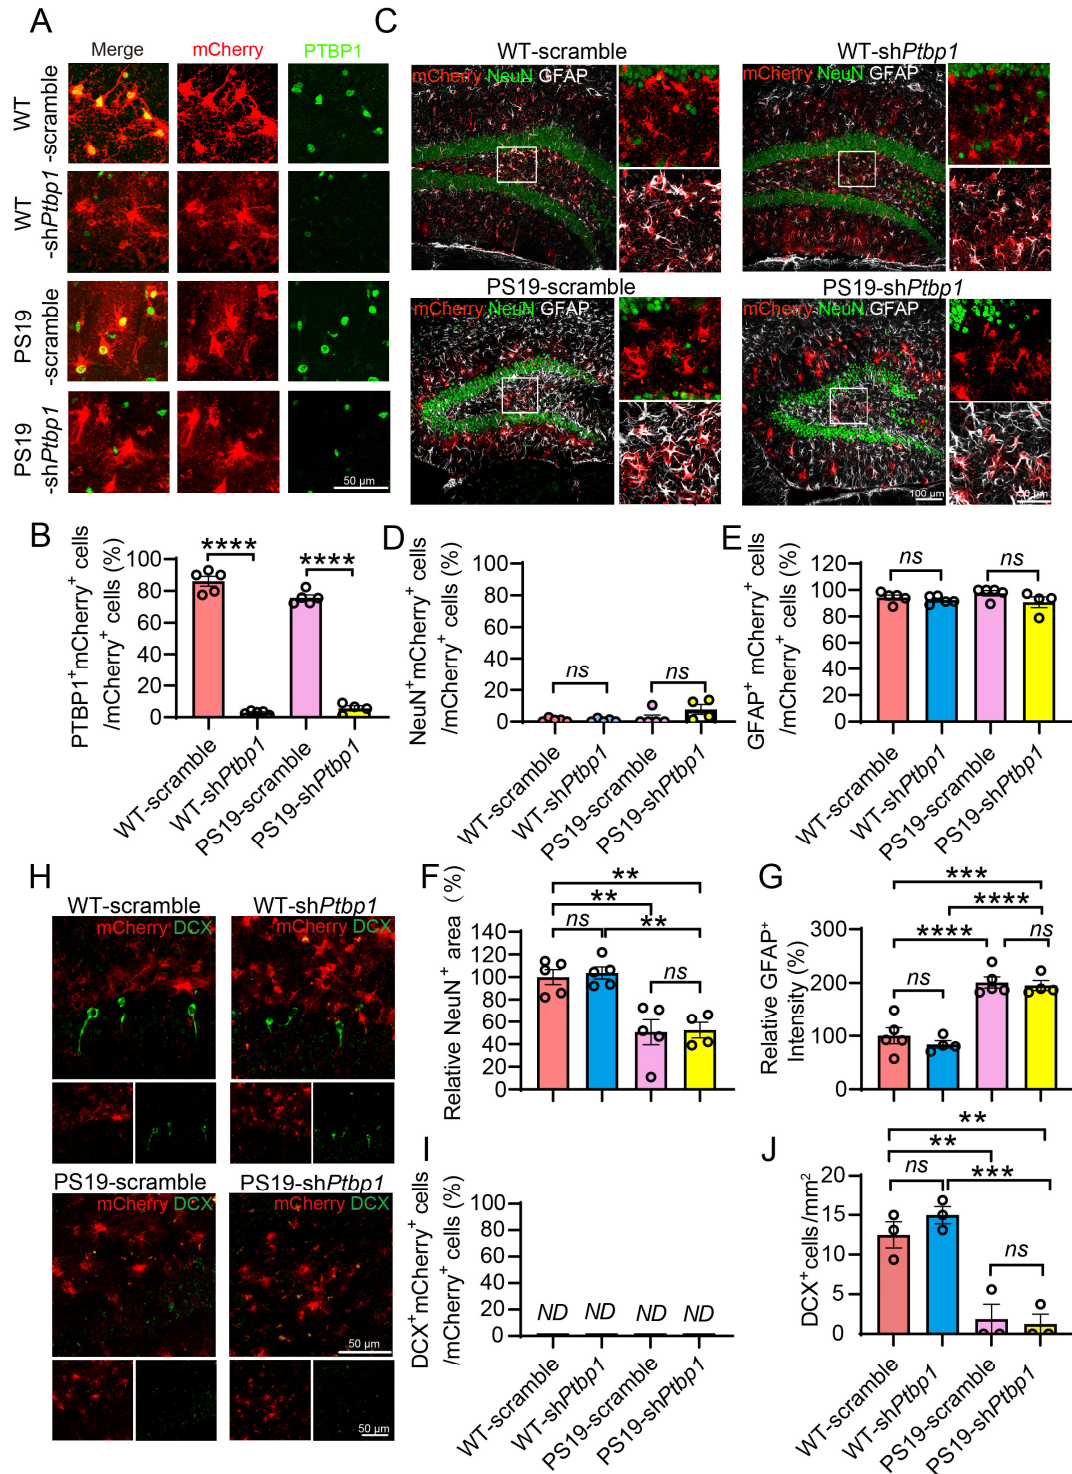

265

266 **Figure 4. Knockdown of PTBP1 cannot convert astrocytes into neurons**

267 **in the hippocampus of PS19 mice**

268 (A and B) Confocal analysis of PTBP1 expression in mCherry<sup>+</sup> cells in the

269 hippocampus of PS19 and WT control mice 3 months after shPtbp1 or the

270 scramble control AAV transduction. (A) Representative images, (B)  
271 quantification. n = 4 to 5 animals, unpaired t-test. (C to G) Confocal analysis of  
272 fluorescent cells. (C) Representative images, (D-G) quantification. n = 4 to 5  
273 animals, one-way ANOVA with Tukey's multiple comparisons. (H to J) Confocal  
274 analysis of mCherry<sup>+</sup> cells and DCX<sup>+</sup> cells. (H) Representative images, (I and  
275 J) quantification. n = 3 animals per group, one-way ANOVA with Tukey's  
276 multiple comparisons. All quantified data are represented as mean ± SEM; \*\*p  
277 <0.01; \*\*\*p <0.001; \*\*\*\*p <0.0001; ns, not significant; ND, undetectable. Figure  
278 4—source data 1 to 7, source data for Figure 4B, 4D, 4E, 4F, 4G, 4I, 4J.

279

280 Cognitive function of PS19 and WT mice transduced with AAV-sh*Ptbp1* or  
281 AAV-scramble were also assessed. In the NOR test, PS19 mice spent  
282 significantly less time on the novel object, when compared to the WT control  
283 groups; and downregulation of PTBP1 did not improve this performance  
284 (**Figure 5A**). We next employed contextual fear conditioning (CFC) test to  
285 examine memory decay and found that AAV-sh*Ptbp1* failed to rescue the  
286 deficits of PS19 mice in freezing behaviors, when examined two weeks after  
287 the initial electric shock (**Figure 5B**). In addition, we surveyed synapses and  
288 tau pathology in PS19 mice, and found that loss of SYP<sup>+</sup>PSD95<sup>+</sup> synaptic  
289 clusters and the presence of AT8<sup>+</sup> phosphor-tau deposition remained and were  
290 not alleviated by PTBP1 knockdown (**Figure 5, C to F**). The levels of tau  
291 phosphorylated at T181 site were also not altered (data not shown).



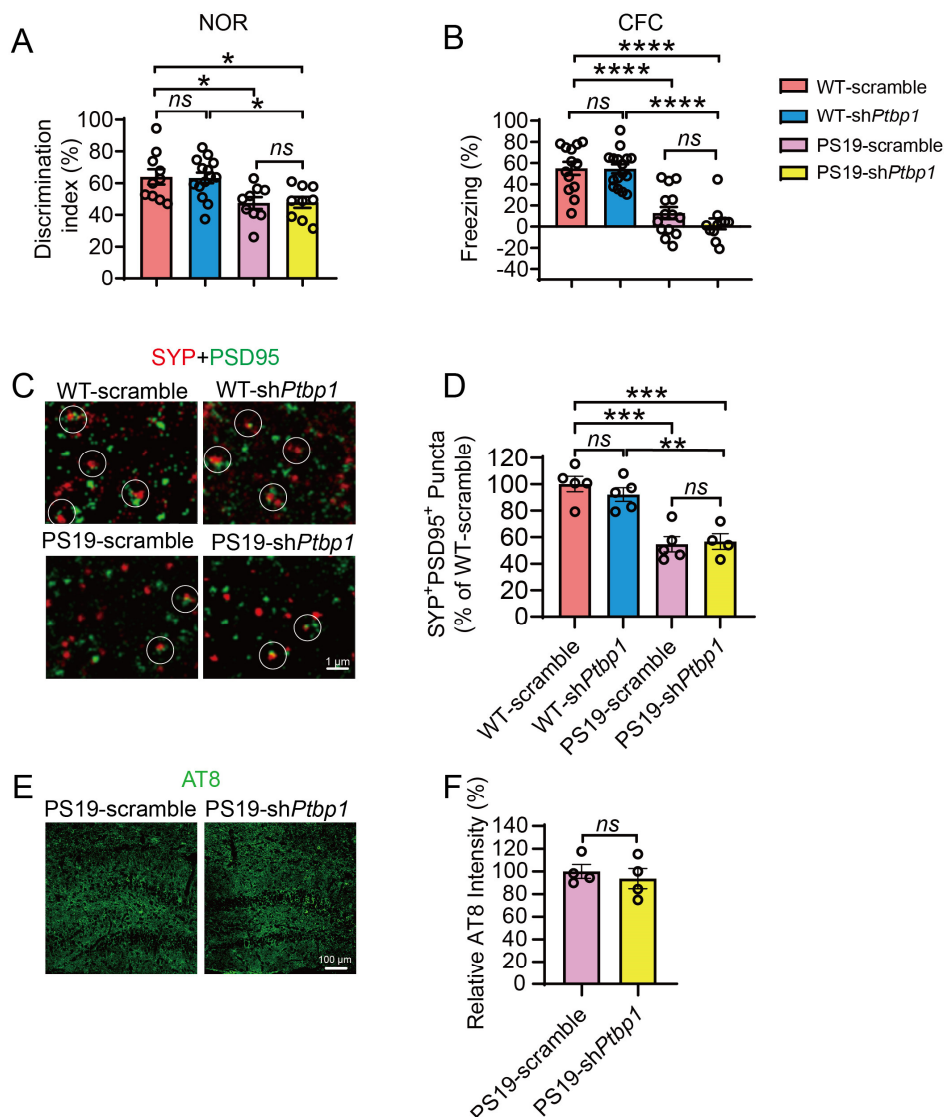

292

293 **Figure 5. Downregulation of PTBP1 in the hippocampus fails to attenuate**  
 294 **cognitive and synaptic deficits as well as tau pathology in PS19 mice**

295 **(A)** Quantification of discrimination indexes in the NOR test of PS19 and WT  
 296 control mice 2.5 month after the shPtbp1 or the scramble control AAV  
 297 transduction. n = 9 to 14 animals, one-way ANOVA with Tukey's multiple  
 298 comparisons. **(B)** Analysis of the freezing behavior of the experimental mouse  
 299 during the CFC test. n= 11 to 16 animals, one-way ANOVA with Tukey's multiple  
 300 comparisons. **(C and D)** Confocal analysis of SYP<sup>+</sup>PSD95<sup>+</sup> synaptic puncta. (C)  
 301 Representative images, (D) quantification. n = 4 to 5 animals, one-way ANOVA  
 302 with Tukey's multiple comparisons. **(E and F)** Confocal analysis of AT8

303 (phospho-tau antibody) stained tau pathology. (E) Representative images, (F)  
304 quantification. n= 4 animals per group, unpaired t-test. All quantified data are  
305 represented as mean  $\pm$  SEM; \*p <0.05; \*\*p <0.01; \*\*\*p <0.001; \*\*\*\*p <0.0001;  
306 *ns*, not significant. Figure 5—source data 1 to 4, source data for Figure 5A, 5B,  
307 5D, 5F.

308

309 Together, our results clearly show that downregulation of PTBP1 in  
310 hippocampal astrocytes fails to convert astrocytes into neurons, and  
311 consequently are unable to improve cognitive function in mice under either  
312 physiological or pathological conditions associated with AD.

313

#### 314 **Downregulation of PTBP1 fails to convert astrocytes into neurons in** 315 **either striatum or substantia nigra of mice**

316 To investigate whether the brain-region specificity exists for the presumed  
317 astroglia-to-neuron conversion induced by PTBP1 downregulation, we injected  
318 AAV-*shPtbp1* or AAV-scramble viruses into the striatum or substantia nigra of  
319 the adult mice, the two brain regions in which a successful astrocyte-to-neuron  
320 conversion by downregulating PTBP1 has been claimed (Qian et al., 2020;  
321 Zhou et al., 2020). In our study, similar to the hippocampus, astrocytic PTBP1  
322 expression was nearly completely downregulated by AAV-*shPtbp1* in the  
323 striatum 1 or 2 months after the viral injection (**Figure 6, A to C**). However, we  
324 found that only a neglectable portion of mCherry<sup>+</sup> cells were NeuN<sup>+</sup>, while most  
325 of mCherry<sup>+</sup> cells were GFAP<sup>+</sup> (**Figure 6, D to F**), indicative of a complete failure  
326 of astrocyte-to-neuron conversion. In addition, the numbers of NeuN<sup>+</sup> or GFAP<sup>+</sup>  
327 cells near the injection site were indistinguishable between AAV-*shPtbp1* and  
328 the control AAV-scramble groups (**Figure 6, G to H**).

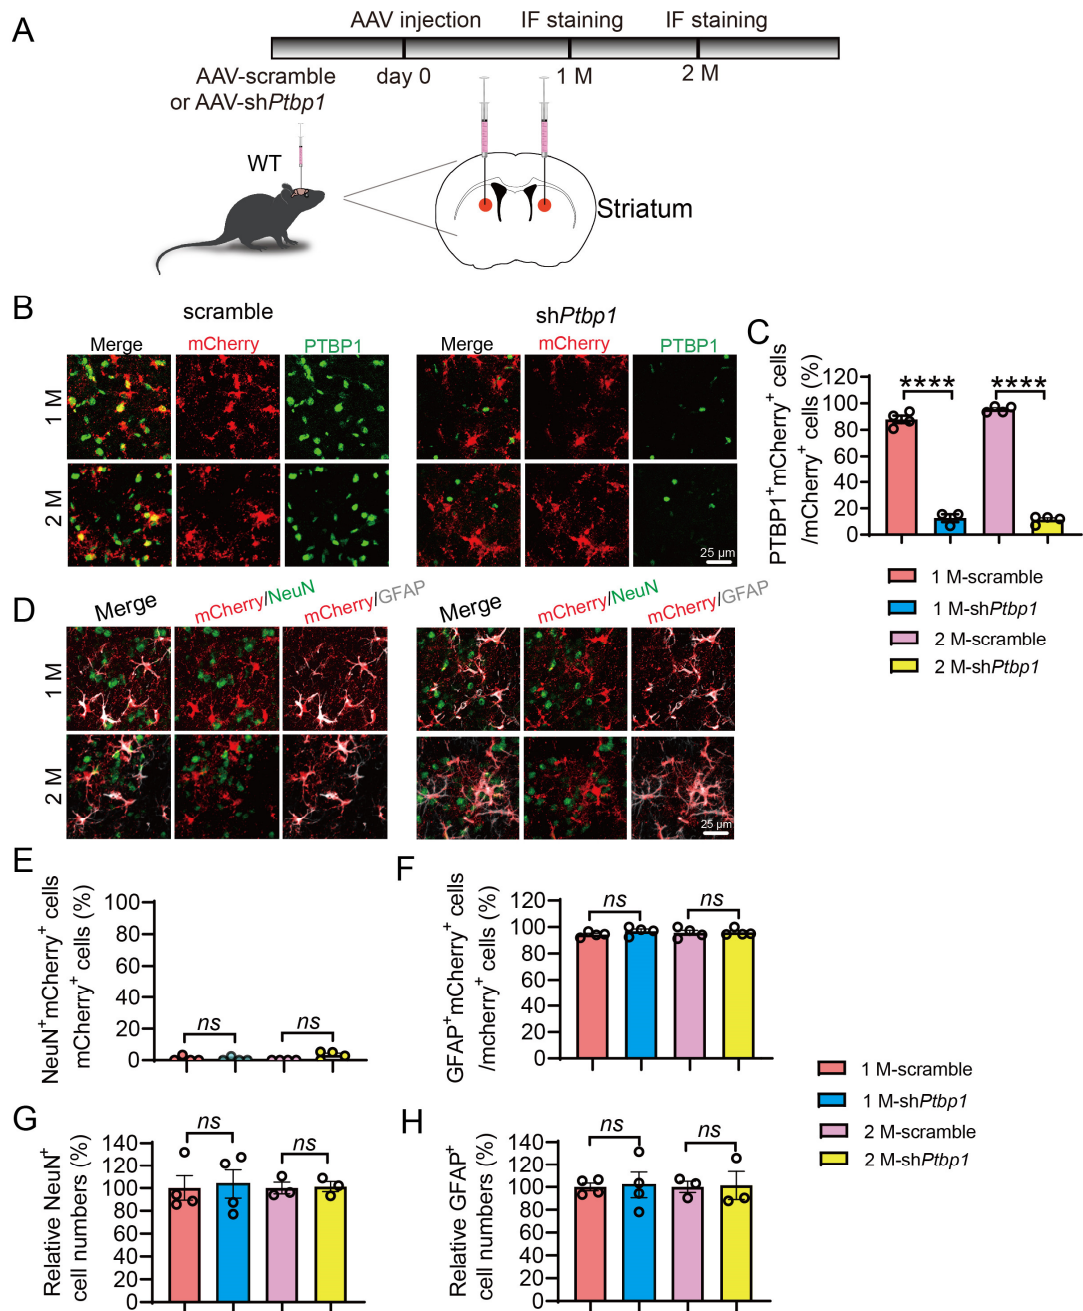

329

330 **Figure 6. Knockdown of PTBP1 cannot convert astrocytes into neurons**  
 331 **in the mouse striatum**

332 (A) Schematic of study design. (B and C) Confocal analysis of PTBP1  
 333 expression in mCherry<sup>+</sup> cells. (B) Representative images, (C) quantification. n  
 334 = 3 to 4 animals, one-way ANOVA with Tukey's multiple comparisons. (D to H)  
 335 Confocal analysis of fluorescent cells. (D) Representative images, (E-H)  
 336 Quantification. n = 3 to 4 animals, one-way ANOVA with Tukey's multiple

337 comparisons. All quantified data are represented as mean  $\pm$  SEM; \*\*\*\*p  
338 <0.0001; *ns*, not significant. Figure 6—source data 1 to 5, source data for Figure  
339 5C, 5E, 5F, 5G, 5H.

340

341 Similar results were obtained in the substantia nigra region: an efficient  
342 knockdown of PTBP1 in astrocytes did not result in any significant differences  
343 in the numbers of NeuN<sup>+</sup>mCherry<sup>+</sup>, GFAP<sup>+</sup>mCherry<sup>+</sup>, NeuN<sup>+</sup> and GFAP<sup>+</sup> cells,  
344 when compared to the scramble control group (**Figure 7, A to H**). Together, our  
345 data clearly demonstrate that downregulation of PTBP1 is unable to convert  
346 astrocytes into neurons in all brain regions tested including the hippocampus,  
347 the striatum and the substantia nigra.

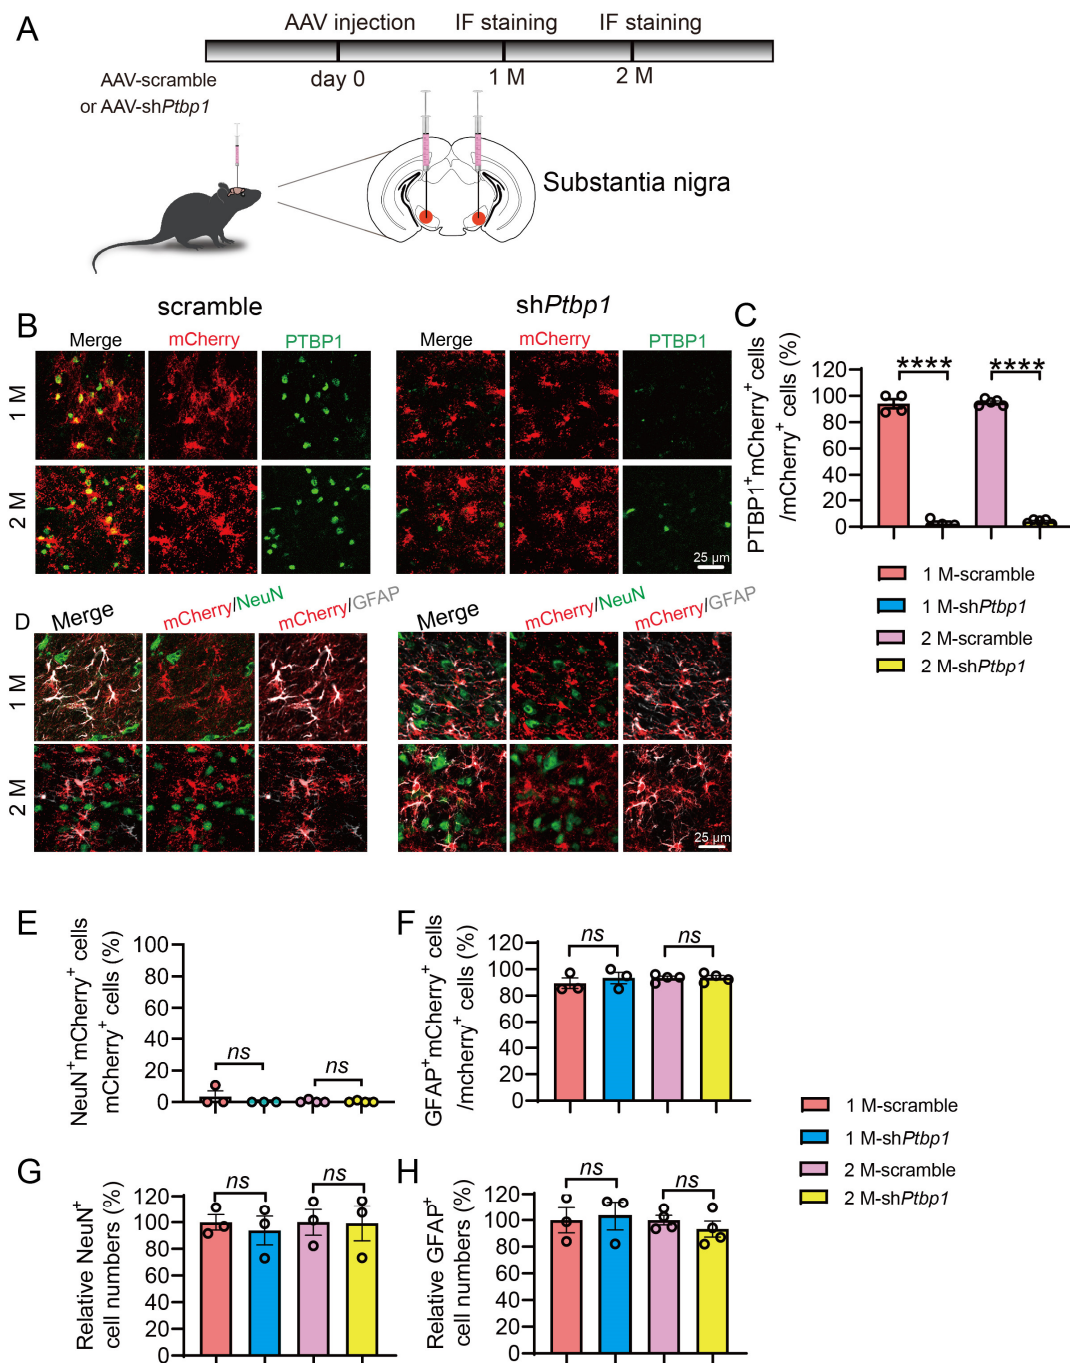

348

349 **Figure 7. Downregulation of PTBP1 cannot convert astrocytes into**  
 350 **neurons in the mouse substantia nigra**

351 **(A)** Schematic of study design. **(B and C)** Confocal analysis of PTBP1  
 352 expression in mCherry<sup>+</sup> cells. **(B)** Representative images, **(C)** quantification. n  
 353 = 4 to 5 animals, one-way ANOVA with Tukey's multiple comparisons. **(D to H)**  
 354 Confocal analysis of fluorescent cells. **(D)** Representative images, **(E-H)**

355 quantification.  $n = 3$  to 4 animals, one-way ANOVA with Tukey's multiple  
356 comparisons. All quantified data are represented as mean  $\pm$  SEM; \*\*\*\* $p$   
357  $<0.0001$ ; *ns*, not significant. Figure 7—source data 1 to 5, source data for Figure  
358 7C, 7E, 7F, 7G, 7H.

359

360

## 361 **Discussion**

362 Having efficiently downregulated PTBP1 in the astrocytes in combination with  
363 cell lineage and transcriptomic analyses, we fail to observe any glia-to-neuron  
364 conversion induced by PTBP1 knockdown in multiple rodent brain regions at  
365 different ages, under either physiological or pathological conditions associated  
366 with AD. Similar to what we have found, a recent study also failed to replicate  
367 the reported astrocyte-to-neuron conversion as a result of PTBP1 knockdown  
368 (Wang et al., 2021). In the same study, Wang et al observed a dramatically  
369 increased number of NeuN<sup>+</sup>mCherry<sup>+</sup> cells in the mouse brain transduced with  
370 astrocyte-restrictive AAV expressing mCherry reporter and NeuroD1. They  
371 therefore employed stringent lineage tracing strategies to investigate the origin  
372 of the increased NeuN<sup>+</sup>mCherry<sup>+</sup> cells, and revealed that they are in fact  
373 endogenous neurons that were experimentally labeled with mCherry due to  
374 altered cell type specificity of the AAV virus induced by NeuroD1  
375 overexpression. Because we found no evidence for neuronal generation  
376 induced by PTBP1 downregulation, it is therefore unnecessary to perform the  
377 lineage tracing analysis.

378 The discrepancies between the findings from Fu-Yang labs and our and  
379 Zhang labs are not likely due to differentially viral toxicities, because similar  
380 titers of AAV were used in all studies; instead, the differential leakage of  
381 astrocytic labeling systems would be more likely. Our AAV driven by the long

382 form *hGFAP* promoter showed extremely low leaky expression in neurons.  
383 Apparent neuronal leakage of Cre expression in neuronal cells has been well  
384 documented in the *mGfap-Cre* line (Wang et al., 2021), which was utilized in  
385 Qian et al. study. Specifically, a control for PTBP1 downregulation was missed  
386 in the experiments evaluating astrocyte to neuron conversion *in vivo* (Qian et  
387 al., 2020), (Fig. 2b-h and Fig. 3). Although the information pertinent to the *GFAP*  
388 promoter in AAV-CasRx plasmids was completely missing in Zhou et al study,  
389 the information from Addgene (<https://www.addgene.org/154001/> and  
390 <https://www.addgene.org/154000/>) shows that these plasmids comprise a short  
391 form *GFAP* promoter. Wang et al, however, was not able to downregulate  
392 PTBP1 and hence trigger glia-to-neuron conversion using the same AAV-  
393 CasRx system (Wang et al., 2021). In addition, we observed that PTBP1  
394 predominantly localizes in nucleus, a subcellular compartment for RNA-binding  
395 proteins, whereas PTPB1 was detected all over the cell without a specific  
396 subcellular localization in Zhou et al. study (Zhou et al., 2020).

397 The definitive aim of neuronal regeneration is to improve, if not completely  
398 restore, brain functions deteriorated in neurodegeneration. Synaptic failure, a  
399 primary cause for cognitive impairment in AD, ought to be rescued if nascent  
400 neurons would be replenished from the resident glia cells. Our results  
401 demonstrate that PTBP1 downregulation cannot improve cognitive and  
402 synaptic function through any mechanisms including the neuronal regeneration.  
403 However, we do not exclude the possibility that PTBP1 downregulation could  
404 improve other brain functions such as motor function, which has been shown  
405 previously (Qian et al., 2020; Zhou et al., 2020). Future experiments are  
406 required to more carefully and in greater details test the strategy targeting  
407 PTBP1 in treating neurodegenerative diseases in not only rodents but also  
408 primates.

409

410 **Materials and methods**

411

412 **Key Resource Table**

| REAGENT or RESOURCE                                      | SOURCE                       | IDENTIFIER                         |
|----------------------------------------------------------|------------------------------|------------------------------------|
| <b>Antibodies</b>                                        |                              |                                    |
| Rabbit polyclonal anti-PTBP1                             | Thermo Fisher Scientific     | Cat# PA5-81297<br>RRID: AB_2788516 |
| Mouse monoclonal anti- $\beta$ -actin                    | ORIGENE                      | Cat# TA-09                         |
| Mouse monoclonal anti-GFAP                               | Cell Signaling Technology    | Cat# 3670S<br>RRID: AB_561049      |
| Mouse monoclonal anti-NeuN                               | Abcam                        | Cat# ab104224<br>RRID: AB_10711040 |
| Mouse monoclonal anti-PSD95                              | Millipore                    | Cat# MAB1596<br>RRID: AB_2092365   |
| Rabbit monoclonal anti-Synaptophysin                     | Abcam                        | Cat# ab16659<br>RRID: AB_443419    |
| Rabbit monoclonal anti-NeuN                              | Cell Signaling Technology    | Cat# 24307<br>RRID: AB_2651140     |
| Rabbit monoclonal anti-Doublecortin                      | Cell Signaling Technology    | Cat# 4604S<br>RRID: AB_561007      |
| Mouse monoclonal anti- $\beta$ -Amyloid,1-16 (6E10)      | BioLegend                    | Cat# 803001<br>RRID: AB_2564653    |
| Mouse monoclonal anti-phospho-Tau (Ser202, Thr205) (AT8) | Thermo Fisher Scientific     | Cat# MN1020<br>RRID: AB_223647     |
| <b>Bacterial and Virus Strains</b>                       |                              |                                    |
| Stable 3 (HB101 <i>E. coli</i> strain)                   | Shanghai Weidi Biotechnology | Cat#DL1046M                        |
| <b>Chemicals, Peptides, and Recombinant Proteins</b>     |                              |                                    |
| TurboFect Transfection Reagent                           | Thermo Fisher Scientific     | Cat# R0534A                        |
| 4, 6-diamidino-2-phenylindole (DAPI)                     | Sigma-Aldrich                | Cat# D9542                         |
| Polyetherimide (PEI)                                     | Fushenbio                    | Cat# FSF0001-1G                    |
| poly-L-lysine hydrobromide                               | Sigma-Aldrich                | Cat#P6282-5MG                      |
| <b>Experimental Models: Cell Lines</b>                   |                              |                                    |
| HEK293T                                                  | ATCC                         | Cat# CRL-3216                      |
| <b>Experimental Models: Organisms/Strains</b>            |                              |                                    |
| Mouse:C57BL/6J                                           | Xiamen University            | N/A                                |



|                                                                     |                   |                                                                     |
|---------------------------------------------------------------------|-------------------|---------------------------------------------------------------------|
| Mouse: 5×FAD: B6SJL-Tg (APPSwFILon, PSEN1*M146L*L286V)6799Vas/Mmjax | The Jackson Lab   | Stock# 034840-JAX<br>RRID:<br>MMRRC_034840-JAX                      |
| Mouse: PS19: B6; C3-Tg (Prnp-MAPT*P301S) PS19Vle/J                  | The Jackson Lab   | Stock# 008169<br>RRID:<br>IMSR_JAX:008169                           |
| <b>Oligonucleotides</b>                                             |                   |                                                                     |
| <i>Ptbp1</i> -ASO<br>5'-GGGTGAAGATCCTGTTCAATA-3'                    | This paper        | N/A                                                                 |
| Ctrl-ASO<br>5'-CAACAAGATGAAGAGCACCAA-3'                             | This paper        | N/A                                                                 |
| <b>Recombinant DNA</b>                                              |                   |                                                                     |
| <i>pAAV-GFAP-mCherry-scramble</i><br>5'-ACCTAAGGTTAAGTCGCCCTCG-3'   | This paper        | N/A                                                                 |
| <i>pAAV-GFAP-mCherry-shPtbp1-1</i><br>5'-GGGTGAAGATCCTGTTCAATA-3'   | This paper        | N/A                                                                 |
| <i>pAAV-GFAP-mCherry-shPtbp1-2</i><br>5'-TGACCTTACAGACCAGAGATTT-3'  | This paper        | N/A                                                                 |
| <i>pAAV-GFAP-mCherry-shPtbp1-3</i><br>5'-ACACTATGGTAACTACTATAC-3'   | This paper        | N/A                                                                 |
| <i>pAdDeltaF6</i>                                                   | Addgene           | Cat# 112867                                                         |
| <i>pAAV2/9</i>                                                      | Addgene           | Cat# 112865                                                         |
| <b>Software and Algorithms</b>                                      |                   |                                                                     |
| ImageJ                                                              | NIH               | <a href="https://imagej.nih.gov/ij/">https://imagej.nih.gov/ij/</a> |
| GraphPad Prism version 9.0                                          | GraphPad Software | <a href="https://www.graphpad.com/">https://www.graphpad.com/</a>   |

413

## 414 **Animals**

415 Wild-type C57BL/6J mice were obtained from the Laboratory Animal Center at  
 416 Xiamen University. 5×FAD mice (The Jackson Lab: Stock #034840-JAX); PS19  
 417 mice ( The Jackson Lab: Stock #008169) were obtained from the Jackson  
 418 Laboratory (Ellsworth, ME, USA) and were backcrossed into the C57BL/6J for  
 419 10 generations. Only male mice were used in behavioral tests, while both male  
 420 and female mice were used in immunohistochemistry. Mice were randomly  
 421 grouped by genotype and age. Experiments were conducted and analyzed in a  
 422 double-blind manner. All animal studies were performed according to the  
 423 protocols approved by the Institutional Animal Care and Use Committee of

424 Xiamen University.

425

### 426 **Isolation and Culture of Primary Mouse Astrocytes**

427 A modified protocol was performed to use (Schildge et al., 2013). Cortical and  
428 hippocampal tissues were dissected from P1-P2 pups and dissociated with 0.05%  
429 trypsin for 30 min at 37 °C. Tissues were centrifuged for 5 min at 500 g and  
430 mechanically dissociated in DMEM/F12 growth media containing 20% FBS and  
431 1% penicillin/streptomycin. Cells were passed through a 70 µm cell strainer,  
432 centrifuged at 500 g for 3 min, and resuspended in the growth media. Cells  
433 were plated into 0.1% poly-L-lysine (Sigma-Aldrich, #P6282) coated 175 cm<sup>2</sup>  
434 flasks for proliferation. To examine the efficiency of AAV-mediated PTPB1  
435 downregulation *in vitro*, cells were re-plated into 6-well plates, transduced with  
436 the AAV and lysed 7 days after the transduction.

437

### 438 **Western blot**

439 Western blot was performed as previously described (Zeng et al., 2019). Briefly,  
440 primary cultured astrocytes were lysed in RIPA buffer (150 mM NaCl, 50 mM  
441 Tris-HCl [pH 8.0], 2 mM EDTA, 1% NP-40, 0.1% SDS, 0.5% sodium  
442 deoxycholate) containing protease inhibitor cocktail (Roche, #04693132001).  
443 Equal amounts of total proteins (20 µg per sample) from the lysates were  
444 resolved by SDS-PAGE. The samples were then probed with the primary  
445 antibodies against PTBP1 (rabbit; 1:1000; Thermo Fisher Scientific; #PA581297)  
446 and β-actin (mouse; 1:5000; ORIGENE; #TA-09), followed by HRP conjugated  
447 secondary antibodies against rabbit or mouse IgG (1:5000; Thermo Fisher  
448 Scientific; #7074S or #7076S).

449

### 450 **Vectors and AAV production**

451 To generate astrocyte specific AAV expression vectors, shRNAs targeting  
452 mouse *Ptbp1* or scrambled shRNA was inserted into an AAV vector driven by

453 the 2.2 kb long human *GFAP* promoter (*pAAV-GFAP-mCherry-miR30E*)  
454 (VectorBuilder: <https://www.vectorbuilder.cn/design/retrieve.html>, VB200627-  
455 1109ntb). The sequences of shRNA-2 and -3 were obtained from Vectorbuilder  
456 ([https://www.vectorbuilder.cn/design/pRP\\_shRNA.html](https://www.vectorbuilder.cn/design/pRP_shRNA.html)), while shRNA-1  
457 sequence was designed based on a recent study ([Qian et al., 2020](#)). The target  
458 sequences of shRNAs and scramble were as follows: scramble: 5'-ACCTA  
459 AGGTT AAGTC GCCCT CG-3'; sh*Ptbp1*-1: 5'-GGGTG AAGAT CCTGT TCAAT  
460 A-3'; sh*Ptbp1*-2: 5'-TGACC TTACA GACCA GAGAT TT-3'; sh*Ptbp1*-3: 5'-  
461 ACACT ATGGT TAACT ACTAT AC-3'.

462 AAV viruses were produced following a well-established protocol with minor  
463 modifications (Challis et al., 2019). Briefly, HEK293T cells (ATCC, #CRL-3216)  
464 were transfected with the pAAV-shRNA, pAAV2/9 Helper (Addgene, #112867),  
465 and pAd-deltaF6 (Addgene, #112865) plasmids. Three days post transfection,  
466 viral particles were collected from the media and lysates of the cells, and  
467 purified by iodixanol gradient ultracentrifugation in a Beckman L-100XP  
468 centrifuge with type 70 Ti rotor at 350,000g for 2 hours and 25 min at 18 °C.

469

### 470 **Stereotactic injection**

471 Stereotactic injection was performed as described previously (Wang et al., 2013;  
472 Zhao et al., 2015). Briefly, after anesthetization with Avertin, the experimental  
473 mice were shaved to remove the head hairs and secured in an automated  
474 stereotaxic injection apparatus (RWD Life Science). Ctrl-ASO or *Ptbp1*- ASO  
475 (2  $\mu$ l, 2.5  $\mu$ g/ $\mu$ L) were injected into the following coordinates: for hippocampal  
476 den-tate gyrus. -2.5 mm anteroposterior (AP) from the bregma,  $\pm$ 2.0 mm  
477 mediolateral (ML), -2.4 mm dorsoventral (DL); The target sequences of ASO  
478 and Ctrl were as follows: PTB-ASO: 5'-GGGTG AAGAT CCTGT TCAAT A-3';  
479 Ctrl-ASO: 5'-CAACA AGATG AAGAG CACCA A-3'; AAV- sh*Ptbp1* or AAV-  
480 scramble (2  $\mu$ l, titer  $1 \times 10^{12}$  viral genomes/mL) viruses were injected into the  
481 following coordinates: for hippocampal dentate gyrus, -2.5 mm anteroposterior

482 (AP) from the bregma,  $\pm 2.0$  mm mediolateral (ML), -2.4 mm dorsoventral (DL);  
483 for striatum, -0.8 mm AP from the bregma,  $\pm 1.6$  mm ML, -2.8 mm DV; for  
484 substantia nigra, -3.0 mm AP from the bregma,  $\pm 1.2$  mm ML, -4.6 mm DL.

485

## 486 **Immunofluorescence**

487 Mice were anesthetized with Avertin followed by intracardial perfusion with PBS  
488 and 4% paraformaldehyde (PFA) in PBS. Mouse brains were dissected quickly,  
489 post-fixed with 4% PFA overnight at 4 °C, and dehydrated with 30% sucrose in  
490 PBS until it completely settled. The brains were then encased in optimal cutting  
491 temperature compound (Sakura; #4583), and cut into serial frozen sections (30-  
492 40  $\mu$ m) using a cryostat (Leica; #CM1950). The sections were permeabilized  
493 and blocked with PBS containing 0.3% Triton X-100 and 10% normal donkey  
494 serum for 45 min at room temperature. The sections were incubated with the  
495 following primary antibodies at 4 °C overnight: mouse anti-GFAP (1:500; CST;  
496 #3670S), rabbit anti-NeuN (1:500; CST; #24307), mouse anti-NeuN (1:1000;  
497 Abcam; #ab104224), rabbit anti-PTBP1 (1:200; Thermo Fisher Scientific; #PA5-  
498 81297), rabbit anti-Doublecortin (1:500; CST; #4604S), mouse anti-PSD95  
499 (1:100; Millipore; #MAB1596), rabbit anti-Synaptophysin (1:200; Abcam;  
500 AB\_443419), mouse anti-A $\beta$  (6E10) (1:500; BioLegend; #803001) and mouse  
501 anti-Phospho-Tau (Ser202, Thr205) (AT8) (1:200; Thermo Fisher Scientific;  
502 #MN1020). Donkey derived secondary antibodies conjugated with Alexa Fluor-  
503 488 or -647 (1:500; Thermo Fisher Scientific; #A-11034) (1:500; Thermo Fisher  
504 Scientific; #A-31571) were used for fluorescence, and DAPI (1  $\mu$ g/ml, Sigma-  
505 Aldrich, #D9542) was used to counterstain nuclei. Images were captured using  
506 a Leica SP8 or Zeiss LSM880 confocal microscope and subjected to  
507 quantification with ImageJ software [National Institutes of Health (NIH),  
508 <https://imagej.nih.gov/ij/>]

509

## 510 **Phospho-Tau examination**

511 The levels of phosphor-Tau (T181) were determined by Single Molecule  
512 Immune Detection method (AstroBio).

513

## 514 **Behavioral tests**

### 515 **Morris water maze (MWM)**

516 MWM tests were performed in a 1.2 m diameter circular tank filled with opaque  
517 water at 22 °C, using a modified protocol (Du et al., 2018). The walls  
518 surrounding the tank were marked with bright, contrasting shapes which serve  
519 as spatial reference cues. A fixed platform (10 cm diameter) was placed in a  
520 selected target quadrant. During training, the platform was submerged and the  
521 mice were placed into the maze at one of four points randomly facing the wall  
522 of the tank. Mice were allowed to search for a platform for 1 min; if the mice  
523 were unable to find the platform, they were gently guided to the platform for 10  
524 s. Two trials a day were conducted with a minimum of a 1 hour intertrial interval.  
525 On day 6, the hidden platform was removed and probe test was performed.  
526 Escape latency to find the platform during training and time spent in target  
527 quadrant during probe test was recorded and analyzed by CleverSys  
528 TopScanLite (Clever Sys, Reston, VA, USA).

529

### 530 **Novel object recognition (NOR)**

531 NOR consists of three phases: habituation, training and test (Zhao et al., 2019).  
532 On day 1, mice were habituated to an open field box (40cm x 40cm x 40cm) for  
533 5 min. On day 2, two same objects were placed in two diagonal corners of the  
534 box, and mice were put into the box and explored for 8 min. 24 hours later (day  
535 3), one of the object was replaced with a novel object, and then mice were put  
536 back to the box and allowed to explore for 8 min. Cumulative time of each  
537 mouse spent on exploring each object was recorded by TopScanLite  
538 (Clever Sys, Reston, VA, USA). The discrimination index was calculated as the  
539 following: discrimination index = novel object exploration time/ (novel object

540 exploration time + familiar object exploration time).

541

### 542 **Contextual fear conditioning (CFC) test**

543 CFC tests were performed based on a modified protocol (Shoji et al.,  
544 2014). On day 1, mice were placed into a conditioning box with a metal plate,  
545 and allowed to explore the box freely for 2 min as habitation. Thereafter, mice  
546 were received a 2 s foot electric shock (0.5 mA) for three times, with a 1 min  
547 interval between each time. Mice were left in the box for an additional min after  
548 the final electric shock. For the contextual test, mice were re-exposed to the  
549 same conditioning box for 5 min, 14 days after training. Time of freezing  
550 behavior for each mouse was analyzed by CleverSys FreezeScan  
551 (Clever Sys, Reston, VA, USA). Freezing % was calculated as the following:  
552  $\text{freezing \%} = (\text{freezing time} / \text{total time}) \text{ during the test} - (\text{freezing time} / \text{total}$   
553  $\text{time}) \text{ during habitation.}$

554

### 555 **Electrophysiology**

556 For analysis of long-term potentiation (LTP), ex-vivo hippocampal slices were  
557 prepared from 10-month-old wild type (WT) and 5×FAD mice at three months  
558 post the transduction of AAV-sh*Ptbp1* or AAV-scramble. All the subsequent  
559 procedures are same as described previously (Zheng et al., 2021).

560

561

### 562 **Acknowledgements**

563 We thank Baoying Xie, Haiping Zheng, Yixian Gao, Xiang You, Qingfeng Liu  
564 and Jingru Huang at Xiamen University for technical assistance.

565

566 **Funding:** This study was supported by grants from National Natural Science  
567 Foundation of China (92049202 to HX, 82071213 to YZ), and a start-up funding  
568 from Xiamen University to YZ.

569

570 **Author contributions:** TG, HX and YZ conceived and designed the study, TG  
571 and XP performed behavioral analysis, XP performed and analyzed  
572 electrophysiology experiments, TG, XP, GJ, DZ carried out  
573 immunofluorescence staining and confocal analysis, JQ, LS and ZW provided  
574 helpful discussion, TG, HX and YZ wrote the manuscript. All authors approved  
575 the manuscript.

576

577 **Competing interests:** The authors declare no competing interests.

578

579 **Data and materials availability:** Quantification results are displayed as mean  
580  $\pm$  SEM. Samples sizes are comparable to those described previously in similar  
581 studies (Qian et al., 2020; Wang et al., 2021), although statistical methods were  
582 not used to predetermine sample sizes in this study. Details for sample sizes  
583 and statistical tests can be found in the figure legends. Statistical analyses were  
584 performed with GraphPad Prism software (version 9.0,  
585 <https://www.graphpad.com/>). Differences were assessed by unpaired t tests or  
586 one-way ANOVA where appropriate. P values < 0.05 were considered as  
587 statistically significant.

588

589

## 590 **References**

591 Challis, R. C., Ravindra Kumar, S., Chan, K. Y., Challis, C., Beadle, K., Jang,  
592 M. J., Kim, H. M., Rajendran, P. S., Tompkins, J. D., Shivkumar, K.,  
593 Deverman, B. E., & Gradinaru, V. (2019). Systemic AAV vectors for  
594 widespread and targeted gene delivery in rodents. *Nat Protoc*, *14*(2),  
595 379-414. <https://doi.org/10.1038/s41596-018-0097-3>  
596 Chen, Y. C., Ma, N. X., Pei, Z. F., Wu, Z., Do-Monte, F. H., Keefe, S., Yellin, E.,  
597 Chen, M. S., Yin, J. C., Lee, G., Minier-Toribio, A., Hu, Y., Bai, Y. T., Lee,

- 598 K., Quirk, G. J., & Chen, G. (2020). A NeuroD1 AAV-Based Gene  
599 Therapy for Functional Brain Repair after Ischemic Injury through In Vivo  
600 Astrocyte-to-Neuron Conversion. *Mol Ther*, 28(1), 217-234.  
601 <https://doi.org/10.1016/j.ymthe.2019.09.003>
- 602 Demars, M., Hu, Y. S., Gadadhar, A., & Lazarov, O. (2010). Impaired  
603 neurogenesis is an early event in the etiology of familial Alzheimer's  
604 disease in transgenic mice. *J Neurosci Res*, 88(10), 2103-2117.  
605 <https://doi.org/10.1002/jnr.22387>
- 606 Du, Y., Zhao, Y., Li, C., Zheng, Q., Tian, J., Li, Z., Huang, T. Y., Zhang, W., & Xu,  
607 H. (2018). Inhibition of PKCdelta reduces amyloid-beta levels and  
608 reverses Alzheimer disease phenotypes. *J Exp Med*, 215(6), 1665-1677.  
609 <https://doi.org/10.1084/jem.20171193>
- 610 Fu, H., Rodriguez, G. A., Herman, M., Emrani, S., Nahmani, E., Barrett, G.,  
611 Figueroa, H. Y., Goldberg, E., Hussaini, S. A., & Duff, K. E. (2017). Tau  
612 Pathology Induces Excitatory Neuron Loss, Grid Cell Dysfunction, and  
613 Spatial Memory Deficits Reminiscent of Early Alzheimer's Disease.  
614 *Neuron*, 93(3), 533-541 e535.  
615 <https://doi.org/10.1016/j.neuron.2016.12.023>
- 616 Gage, F. H. (2019). Adult neurogenesis in mammals. *Science*, 364(6443), 827-  
617 828. <https://doi.org/10.1126/science.aav6885>
- 618 Grande, A., Sumiyoshi, K., Lopez-Juarez, A., Howard, J., Sakthivel, B., Aronow,  
619 B., Campbell, K., & Nakafuku, M. (2013). Environmental impact on direct  
620 neuronal reprogramming in vivo in the adult brain. *Nat Commun*, 4, 2373.  
621 <https://doi.org/10.1038/ncomms3373>
- 622 Guo, T., Zhang, D., Zeng, Y., Huang, T. Y., Xu, H., & Zhao, Y. (2020). Molecular  
623 and cellular mechanisms underlying the pathogenesis of Alzheimer's  
624 disease. *Mol Neurodegener*, 15(1), 40. [https://doi.org/10.1186/s13024-  
625 020-00391-7](https://doi.org/10.1186/s13024-020-00391-7)



- 626 Guo, Z., Zhang, L., Wu, Z., Chen, Y., Wang, F., & Chen, G. (2014). In vivo direct  
627 reprogramming of reactive glial cells into functional neurons after brain  
628 injury and in an Alzheimer's disease model. *Cell Stem Cell*, 14(2), 188-  
629 202. <https://doi.org/10.1016/j.stem.2013.12.001>
- 630 Kalia, L. V., & Lang, A. E. (2015). Parkinson's disease. *Lancet*, 386(9996), 896-  
631 912. [https://doi.org/10.1016/S0140-6736\(14\)61393-3](https://doi.org/10.1016/S0140-6736(14)61393-3)
- 632 Kempermann, G., Gage, F. H., Aigner, L., Song, H., Curtis, M. A., Thuret, S.,  
633 Kuhn, H. G., Jessberger, S., Frankland, P. W., Cameron, H. A., Gould,  
634 E., Hen, R., Abrous, D. N., Toni, N., Schinder, A. F., Zhao, X., Lucassen,  
635 P. J., & Frisen, J. (2018). Human Adult Neurogenesis: Evidence and  
636 Remaining Questions. *Cell Stem Cell*, 23(1), 25-30.  
637 <https://doi.org/10.1016/j.stem.2018.04.004>
- 638 Leavitt, B. R., & Tabrizi, S. J. (2020). Antisense oligonucleotides for  
639 neurodegeneration. *Science*, 367(6485), 1428-1429.  
640 <https://doi.org/10.1126/science.aba4624>
- 641 Lentini, C., d'Orange, M., Marichal, N., Trottmann, M. M., Vignoles, R., Foucault,  
642 L., Verrier, C., Massera, C., Raineteau, O., Conzelmann, K. K., Rival-  
643 Gervier, S., Depaulis, A., Berninger, B., & Heinrich, C. (2021).  
644 Reprogramming reactive glia into interneurons reduces chronic seizure  
645 activity in a mouse model of mesial temporal lobe epilepsy. *Cell Stem*  
646 *Cell*. <https://doi.org/10.1016/j.stem.2021.09.002>
- 647 Liu, Y., Miao, Q., Yuan, J., Han, S., Zhang, P., Li, S., Rao, Z., Zhao, W., Ye, Q.,  
648 Geng, J., Zhang, X., & Cheng, L. (2015). Ascl1 Converts Dorsal Midbrain  
649 Astrocytes into Functional Neurons In Vivo. *J Neurosci*, 35(25), 9336-  
650 9355. <https://doi.org/10.1523/JNEUROSCI.3975-14.2015>
- 651 Maimon, R., Chillon-Marin, C., Snethlage, C. E., Singhal, S. M., McAlonis-  
652 Downes, M., Ling, K., Rigo, F., Bennett, C. F., Da Cruz, S., Hnasko, T.  
653 S., Muotri, A. R., & Cleveland, D. W. (2021). Therapeutically viable  
654 generation of neurons with antisense oligonucleotide suppression of

- 655 PTB. *Nat Neurosci*, 24(8), 1089-1099. [https://doi.org/10.1038/s41593-](https://doi.org/10.1038/s41593-021-00864-y)  
656 [021-00864-y](https://doi.org/10.1038/s41593-021-00864-y)
- 657 Matsuda, T., Irie, T., Katsurabayashi, S., Hayashi, Y., Nagai, T., Hamazaki, N.,  
658 Adefuin, A. M. D., Miura, F., Ito, T., Kimura, H., Shirahige, K., Takeda, T.,  
659 Iwasaki, K., Imamura, T., & Nakashima, K. (2019). Pioneer Factor  
660 NeuroD1 Rearranges Transcriptional and Epigenetic Profiles to Execute  
661 Microglia-Neuron Conversion. *Neuron*, 101(3), 472-485 e477.  
662 <https://doi.org/10.1016/j.neuron.2018.12.010>
- 663 Mattugini, N., Bocchi, R., Scheuss, V., Russo, G. L., Torper, O., Lao, C. L., &  
664 Gotz, M. (2019). Inducing Different Neuronal Subtypes from Astrocytes  
665 in the Injured Mouse Cerebral Cortex. *Neuron*, 103(6), 1086-1095 e1085.  
666 <https://doi.org/10.1016/j.neuron.2019.08.009>
- 667 Mesulam, M. M. (1999). Neuroplasticity failure in Alzheimer's disease: bridging  
668 the gap between plaques and tangles. *Neuron*, 24(3), 521-529.  
669 [https://doi.org/10.1016/s0896-6273\(00\)81109-5](https://doi.org/10.1016/s0896-6273(00)81109-5)
- 670 Miller, T., Cudkowicz, M., Shaw, P. J., Andersen, P. M., Atassi, N., Bucelli, R. C.,  
671 Genge, A., Glass, J., Ladha, S., Ludolph, A. L., Maragakis, N. J.,  
672 McDermott, C. J., Pestronk, A., Ravits, J., Salachas, F., Trudell, R., Van  
673 Damme, P., Zinman, L., Bennett, C. F., Lane, R., Sandrock, A., Runz, H.,  
674 Graham, D., Houshyar, H., McCampbell, A., Nestorov, I., Chang, I.,  
675 McNeill, M., Fanning, L., Fradette, S., & Ferguson, T. A. (2020). Phase  
676 1-2 Trial of Antisense Oligonucleotide Tofersen for SOD1 ALS. *N Engl J*  
677 *Med*, 383(2), 109-119. <https://doi.org/10.1056/NEJMoa2003715>
- 678 Miller, T. M., Pestronk, A., David, W., Rothstein, J., Simpson, E., Appel, S. H.,  
679 Andres, P. L., Mahoney, K., Allred, P., Alexander, K., Ostrow, L. W.,  
680 Schoenfeld, D., Macklin, E. A., Norris, D. A., Manousakis, G., Crisp, M.,  
681 Smith, R., Bennett, C. F., Bishop, K. M., & Cudkowicz, M. E. (2013). An  
682 antisense oligonucleotide against SOD1 delivered intrathecally for  
683 patients with SOD1 familial amyotrophic lateral sclerosis: a phase 1,

- 684 randomised, first-in-man study. *Lancet Neurol*, 12(5), 435-442.  
685 [https://doi.org/10.1016/S1474-4422\(13\)70061-9](https://doi.org/10.1016/S1474-4422(13)70061-9)
- 686 Niu, W., Zang, T., Smith, D. K., Vue, T. Y., Zou, Y., Bachoo, R., Johnson, J. E.,  
687 & Zhang, C. L. (2015). SOX2 reprograms resident astrocytes into neural  
688 progenitors in the adult brain. *Stem Cell Reports*, 4(5), 780-794.  
689 <https://doi.org/10.1016/j.stemcr.2015.03.006>
- 690 Olanow, C. W., Goetz, C. G., Kordower, J. H., Stoessl, A. J., Sossi, V., Brin, M.  
691 F., Shannon, K. M., Nauert, G. M., Perl, D. P., Godbold, J., & Freeman,  
692 T. B. (2003). A double-blind controlled trial of bilateral fetal nigral  
693 transplantation in Parkinson's disease. *Ann Neurol*, 54(3), 403-414.  
694 <https://doi.org/10.1002/ana.10720>
- 695 Perez-Nievas, B. G., & Serrano-Pozo, A. (2018). Deciphering the Astrocyte  
696 Reaction in Alzheimer's Disease. *Front Aging Neurosci*, 10, 114.  
697 <https://doi.org/10.3389/fnagi.2018.00114>
- 698 Qian, H., Kang, X., Hu, J., Zhang, D., Liang, Z., Meng, F., Zhang, X., Xue, Y.,  
699 Maimon, R., Dowdy, S. F., Devaraj, N. K., Zhou, Z., Mobley, W. C.,  
700 Cleveland, D. W., & Fu, X. D. (2020). Reversing a model of Parkinson's  
701 disease with in situ converted nigral neurons. *Nature*, 582(7813), 550-  
702 556. <https://doi.org/10.1038/s41586-020-2388-4>
- 703 Schildge, S., Bohrer, C., Beck, K., & Schachtrup, C. (2013). Isolation and  
704 culture of mouse cortical astrocytes. *J Vis Exp*(71).  
705 <https://doi.org/10.3791/50079>
- 706 Shoji, H., Takao, K., Hattori, S., & Miyakawa, T. (2014). Contextual and cued  
707 fear conditioning test using a video analyzing system in mice. *J Vis*  
708 *Exp*(85). <https://doi.org/10.3791/50871>
- 709 Tai, W., Wu, W., Wang, L. L., Ni, H., Chen, C., Yang, J., Zang, T., Zou, Y., Xu,  
710 X. M., & Zhang, C. L. (2021). In vivo reprogramming of NG2 glia enables  
711 adult neurogenesis and functional recovery following spinal cord injury.

- 712 *Cell Stem Cell*, 28(5), 923-937 e924.  
713 <https://doi.org/10.1016/j.stem.2021.02.009>
- 714 Torper, O., Ottosson, D. R., Pereira, M., Lau, S., Cardoso, T., Grealish, S., &  
715 Parmar, M. (2015). In Vivo Reprogramming of Striatal NG2 Glia into  
716 Functional Neurons that Integrate into Local Host Circuitry. *Cell Rep*,  
717 12(3), 474-481. <https://doi.org/10.1016/j.celrep.2015.06.040>
- 718 Trounson, A., & McDonald, C. (2015). Stem Cell Therapies in Clinical Trials:  
719 Progress and Challenges. *Cell Stem Cell*, 17(1), 11-22.  
720 <https://doi.org/10.1016/j.stem.2015.06.007>
- 721 Wang, L. L., Serrano, C., Zhong, X., Ma, S., Zou, Y., & Zhang, C. L. (2021).  
722 Revisiting astrocyte to neuron conversion with lineage tracing in vivo.  
723 *Cell*. <https://doi.org/10.1016/j.cell.2021.09.005>
- 724 Wang, X., Zhao, Y., Zhang, X., Badie, H., Zhou, Y., Mu, Y., Loo, L. S., Cai, L.,  
725 Thompson, R. C., Yang, B., Chen, Y., Johnson, P. F., Wu, C., Bu, G.,  
726 Mobley, W. C., Zhang, D., Gage, F. H., Ranscht, B., Zhang, Y. W., Lipton,  
727 S. A., Hong, W., & Xu, H. (2013). Loss of sorting nexin 27 contributes to  
728 excitatory synaptic dysfunction by modulating glutamate receptor  
729 recycling in Down's syndrome. *Nat Med*, 19(4), 473-480.  
730 <https://doi.org/10.1038/nm.3117>
- 731 Yoshiyama, Y., Higuchi, M., Zhang, B., Huang, S. M., Iwata, N., Saido, T. C.,  
732 Maeda, J., Suhara, T., Trojanowski, J. Q., & Lee, V. M. (2007). Synapse  
733 loss and microglial activation precede tangles in a P301S tauopathy  
734 mouse model. *Neuron*, 53(3), 337-351.  
735 <https://doi.org/10.1016/j.neuron.2007.01.010>
- 736 Zaletel, I., Schwirtlich, M., Perovic, M., Jovanovic, M., Stevanovic, M., Kanazir,  
737 S., & Puskas, N. (2018). Early Impairments of Hippocampal  
738 Neurogenesis in 5xFAD Mouse Model of Alzheimer's Disease Are  
739 Associated with Altered Expression of SOXB Transcription Factors. *J*  
740 *Alzheimers Dis*, 65(3), 963-976. <https://doi.org/10.3233/JAD-180277>

- 741 Zeng, F., Ma, X., Zhu, L., Xu, Q., Zeng, Y., Gao, Y., Li, G., Guo, T., Zhang, H.,  
742 Tang, X., Wang, Z., Ye, Z., Zheng, L., Zhang, H., Zheng, Q., Li, K., Lu,  
743 J., Qi, X., Luo, H., Zhang, X., Wang, Z., Zhou, Y., Yao, Y., Ke, R., Zhou,  
744 Y., Liu, Y., Sun, H., Huang, T., Shao, Z., Xu, H., & Wang, X. (2019). The  
745 deubiquitinase USP6 affects memory and synaptic plasticity through  
746 modulating NMDA receptor stability. *PLoS Biol*, *17*(12), e3000525.  
747 <https://doi.org/10.1371/journal.pbio.3000525>
- 748 Zhao, D., Meng, J., Zhao, Y., Huo, Y., Liu, Y., Zheng, N., Zhang, M., Gao, Y.,  
749 Chen, Z., Sun, H., Wang, X., Jing, C., Zhang, T., Zhang, X., Luo, H.,  
750 Wang, X., Zhang, J., Liu, F. R., Li, Y., Bu, G., Wen, L., Huang, T. Y., Xu,  
751 H., & Zhang, Y. W. (2019). RPS23RG1 Is Required for Synaptic Integrity  
752 and Rescues Alzheimer's Disease-Associated Cognitive Deficits. *Biol*  
753 *Psychiatry*, *86*(3), 171-184.  
754 <https://doi.org/10.1016/j.biopsych.2018.08.009>
- 755 Zhao, Y., Tseng, I. C., Heyser, C. J., Rockenstein, E., Mante, M., Adame, A.,  
756 Zheng, Q., Huang, T., Wang, X., Arslan, P. E., Chakrabarty, P., Wu, C.,  
757 Bu, G., Mobley, W. C., Zhang, Y. W., St George-Hyslop, P., Masliah, E.,  
758 Fraser, P., & Xu, H. (2015). Apoptosis-Mediated Caspase Cleavage of  
759 Tau Contributes to Progressive Supranuclear Palsy Pathogenesis.  
760 *Neuron*, *87*(5), 963-975. <https://doi.org/10.1016/j.neuron.2015.08.020>
- 761 Zheng, Q., Li, G., Wang, S., Zhou, Y., Liu, K., Gao, Y., Zhou, Y., Zheng, L., Zhu,  
762 L., Deng, Q., Wu, M., Di, A., Zhang, L., Zhao, Y., Zhang, H., Sun, H.,  
763 Dong, C., Xu, H., & Wang, X. (2021). Trisomy 21-induced dysregulation  
764 of microglial homeostasis in Alzheimer's brains is mediated by USP25.  
765 *Sci Adv*, *7*(1). <https://doi.org/10.1126/sciadv.abe1340>
- 766 Zhou, H., Su, J., Hu, X., Zhou, C., Li, H., Chen, Z., Xiao, Q., Wang, B., Wu, W.,  
767 Sun, Y., Zhou, Y., Tang, C., Liu, F., Wang, L., Feng, C., Liu, M., Li, S.,  
768 Zhang, Y., Xu, H., Yao, H., Shi, L., & Yang, H. (2020). Glia-to-Neuron  
769 Conversion by CRISPR-CasRx Alleviates Symptoms of Neurological

770 Disease in Mice. *Cell*, 181(3), 590-603 e516.

771 <https://doi.org/10.1016/j.cell.2020.03.024>

772

773

774

## Supplementary Materials

775

776 **Figure 1—figure supplement 1. *Ptbp1*-ASO does not specifically enter**  
777 **astrocytes and fails to promote neuronal generation in the mouse**  
778 **hippocampus**

779

780 **Figure 2—figure supplement 1. AAV-mediated PTBP1 downregulation**  
781 **fails to convert hippocampal astrocytes into neurons in 5×FAD mice 1**  
782 **month after the AAV transduction**

783

784

785

786

787

788

789

790

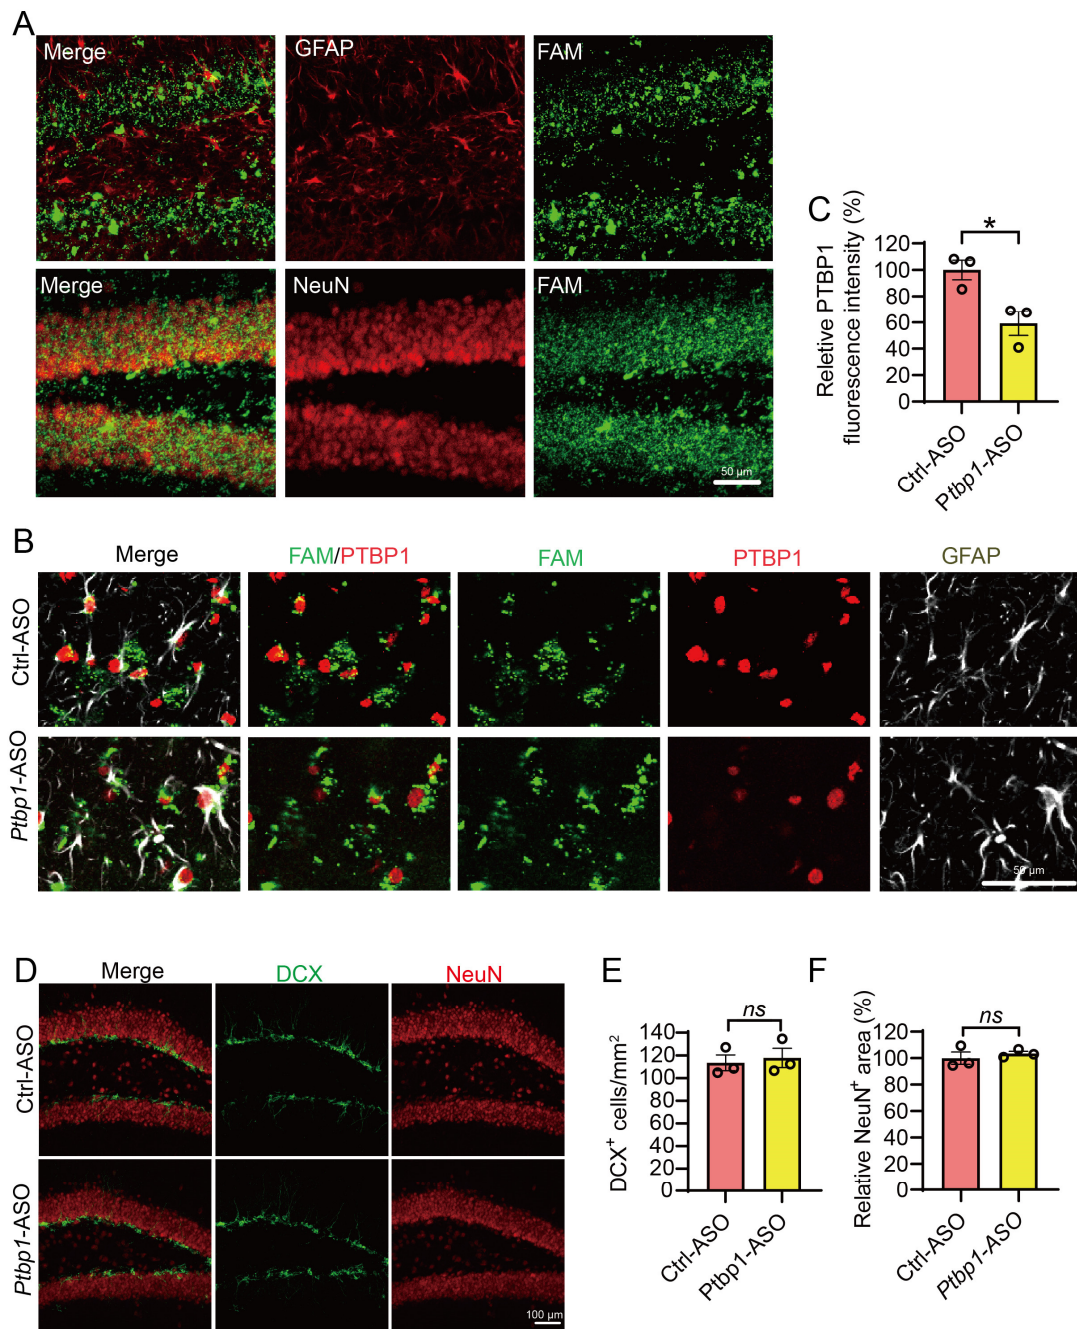

791

792 **Figure 1—figure supplement 1. *Ptpbp1*-ASO does not specifically enter**  
793 **astrocytes and fails to promote neuronal generation in the mouse**  
794 **hippocampus**



795 **(A)** Confocal analysis of cellular distribution of FAM-ASO in the hippocampus.  
796 **(B and C)** Confocal analysis of PTBP1 expression in FAM<sup>+</sup>GFAP<sup>+</sup> cells. (B)  
797 Representative images, (C) quantification. n = 3 animals per group, unpaired t-  
798 test. **(D to F)** Confocal analysis of DCX<sup>+</sup> cells and NeuN<sup>+</sup> cells. (D)  
799 Representative images, (E and F) quantification. n = 3 animals per group,  
800 unpaired t-test. All quantified data are represented as mean ± SEM; \*p <0.05;  
801 *ns*, not significant. Figure 1 figure supplement 1—source data 1 to 3, source  
802 data for Figure 1—figure supplement 1C, 1E, 1F.

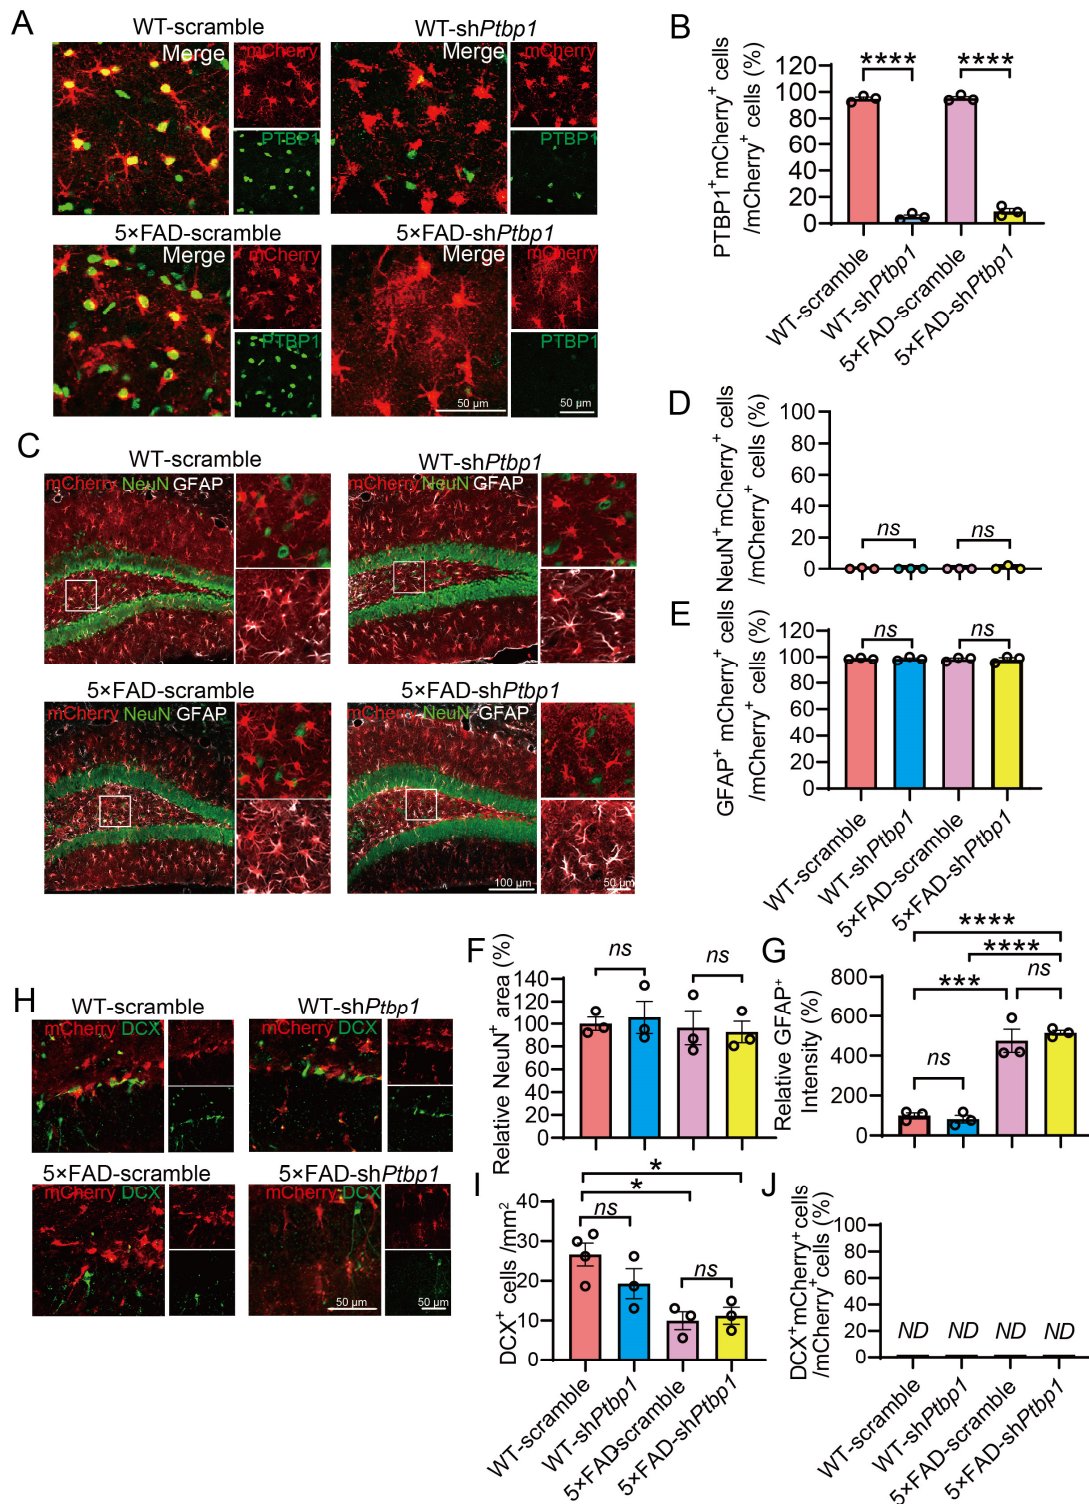

803

804 **Figure 2—figure supplement 1. AAV-mediated PTBP1 downregulation**  
 805 **fails to convert hippocampal astrocytes into neurons in 5x FAD mice 1**  
 806 **month after the AAV transduction**

807 (A and B) Confocal analysis of PTBP1 expression in mCherry<sup>+</sup> cells. (A)

808 Representative images, (B) quantification. n = 3 animals per group, unpaired t-

809 test. **(C to G)** Confocal analysis of fluorescent cells. (C) Representative images,  
810 (D-G) quantification. n = 3 animals per group, one-way ANOVA with Tukey's  
811 multiple comparisons. **(H to J)** Confocal analysis of mCherry<sup>+</sup> cells and DCX<sup>+</sup>  
812 cells. (H) Representative images (I and J) quantification. n = 3 to 4 animals,  
813 one-way ANOVA with Tukey's multiple comparisons. All quantified data are  
814 represented as mean ± SEM; \*p <0.05; \*\*\*p <0.001; \*\*\*\*p <0.0001; *ns*, not  
815 significant; ND, undetectable. Figure 2-figure supplement 1—source data 1 to  
816 7, source data for Figure 2—figure supplement 1B, 1D, 1E, 1F, 1G, 1I, 1J.  
817  
818
